# Supplementary material for: Stoichiometry-controlled cycloaddition of nitrilimines with unsymmetrical exocyclic dienones: microwave-assisted synthesis of novel mono- and dispiropyrazoline derivatives
Source: Royal Society of Chemistry journal article supplement (doi:10.1039/c6ra09703k), 2016-01-01
Supplement: c6ra09703k1.pdf [file c6ra09703k1.pdf]

## Stoichiometry-controlled cycloaddition of nitrilimines with unsymmetrical exocyclic dienones: Microwave-assisted synthesis of novel mono and dispiropyrazoline derivatives

Houda Gazzeh,<sup>a</sup> Sarra Boudriga,<sup>a</sup> Moheddine Askri,<sup>a,\*</sup> Abderrahim Khatyr,<sup>b</sup> Michael Knorr,<sup>b</sup> Carsten Strohmann,<sup>c</sup> Christopher Golz,<sup>c</sup> Yoann Rousselin,<sup>d</sup> Marek M. Kubicki<sup>d</sup>

<sup>a</sup>Laboratory of Heterocyclic Chemistry Natural product and Reactivity/CHPNR, Department of Chemistry, Faculty of Science of Monastir, 5000 Monastir, Tunisia. E-mail: [moheddine.askri@fsm.rnu.tn](mailto:moheddine.askri@fsm.rnu.tn); Tel: +216 98676187.

<sup>b</sup>Institut UTINAM - UMR CNRS 6213, Université de Franche-Comté, 16 Route de Gray, 25030 Besançon, France

<sup>c</sup>Technische Universität Dortmund, Anorganische Chemie Otto-Hahn-Strasse 6, 44221 Dortmund (Germany)

<sup>d</sup>Institute of Molecular Chemistry - UMR CNRS 6302, University of Bourgogne, 9 Avenue A. Savary, F-21078 Dijon, France

### Supporting information

| Table of contents                                                                                   | Page |
|-----------------------------------------------------------------------------------------------------|------|
| 1. Spectroscopic data of synthesized compounds <b>3</b> and <b>4</b>                                | 2-8  |
| 2. <sup>1</sup> H and <sup>13</sup> C-NMR Spectra of compounds <b>3</b> and <b>4</b> (Fig. 1 to 40) | 8-27 |

## 1. Spectroscopic data of synthesized compounds 3 and 4

### **Spiro[(4R\*, 5R\*)-4-hydro-1,3,4-triphenyl- $\Delta^2$ -pyrazoline-5:3'-1'-(benzylidene)]tetral-2'-one (3a)**

Orange crystals (0.43g, 85%); mp 104°C  $\pm$ 2;  $^1\text{H}$  NMR:  $\delta$  2.79 (d, 1H,  $J$  = 15 MHz, H-4'), 3.96 (d, 1H,  $J$  = 15 MHz, H-4'), 4.5 (s, 1H, H-4), 6.2-7.59 (m, 22H,  $\text{H}_{\text{arom}}$ ), 7.96 (s, 1H,  $\text{H}_{\text{ethylenic}}$ );  $^{13}\text{C}$  NMR:  $\delta$  33.1, 61.1, 75.3, 117.9, 121.1, 126.1, 126.9, 127.7, 127.9, 128.0, 128.2, 128.4, 128.6, 129.2, 129.5, 130.2, 131.0, 132.0, 132.2, 134.0, 135.0, 135.3, 139.0, 143.2, 147.6, 195.7; IR ( $\nu_{\text{max}}$ ,  $\text{cm}^{-1}$ ): 1369, 1485, 1691  $\text{cm}^{-1}$ ; Anal Calcd for  $\text{C}_{37}\text{H}_{28}\text{N}_2\text{O}$ : C, 86.02; H, 5.46; N, 5.42; Found: C, 85.90; H, 5.40; N, 5.35.

### **Spiro[(4R\*, 5R\*)-4-hydro-1,3-diphenyl-4-*p*-tolyl- $\Delta^2$ -pyrazoline-5:3'-1'-(*p*-tolylidene)]tetral-2'-one (3b)**

Orange crystals (0.4 g, 73%); mp 248°C  $\pm$ 2;  $^1\text{H}$  NMR:  $\delta$  2.28 (s, 3H,  $\text{CH}_3$ ), 2.37 (s, 3H,  $\text{CH}_3$ ), 2.76 (d, 1H,  $J$ =15 MHz, H-4'), 3.93 (d, 1H,  $J$ =15MHz, H-4'), 4.47 (s, 1H, H-4), 6.22-7.25 (m, 22H,  $\text{H}_{\text{arom}}$ ), 7.91 (s, 1H,  $\text{H}_{\text{ethylenic}}$ );  $^{13}\text{C}$  NMR  $\delta$  = 21.1, 21.5, 32.8, 60.6, 75.2, 117.6, 120.9, 126.2, 127.5, 128.0, 128.1, 128.7, 129.2, 129.8, 129.9, 130.8, 131.2, 131.2, 131.9, 132.1, 134.9, 137.4, 139.2, 139.8, 143.1, 147.7, 195.9; IR ( $\nu_{\text{max}}$ ,  $\text{cm}^{-1}$ ): 1367, 1486, 1689  $\text{cm}^{-1}$ ; Anal Calcd for  $\text{C}_{39}\text{H}_{32}\text{N}_2\text{O}$ : C, 86.00; H, 5.92; N, 5.14; Found: C, 85.97; H, 5.87; N, 4.91.

### **Spiro[(4R\*, 5R\*)-4-*p*-anis-4-hydro-1,3-diphenyl- $\Delta^2$ -pyrazoline-5:3'-1'-(*p*-anisylidene)]tetral-2'-one (3c)**

Orange crystals (0.47 g, 82%); mp 196°C  $\pm$ 2;  $^1\text{H}$  NMR :  $\delta$  2.73 (d, 1H,  $J$  = 15MHz, H-4'), 3.75 (s, 3H,  $\text{OCH}_3$ ), 3.84 (s, 3H,  $\text{OCH}_3$ ), 3.93 (d, 1H,  $J$ =15MHz, H-4'), 4.43 (s, 1H, H-4), 6.29-7.57 (m, 22H,  $\text{H}_{\text{arom}}$ ), 7.88 (s, 1H,  $\text{H}_{\text{ethylenic}}$ );  $^{13}\text{C}$  NMR:  $\delta$  32.9, 55.2, 55.3, 60.2, 75.3, 113.9, 117.6, 120.8, 126, 126.1, 126.2, 127.3, 127.4, 127.8, 127.9, 128.0, 129.9, 129.9, 131.4, 131.7, 131.9, 134.9, 139, 143.1, 147.8, 159.1, 160.7, 195.7; IR ( $\nu_{\text{max}}$ ,  $\text{cm}^{-1}$ ): 1370, 1485, 1690  $\text{cm}^{-1}$ ; Anal Calcd for  $\text{C}_{39}\text{H}_{32}\text{N}_2\text{O}_3$ : C, 81.23; H, 5.59; N, 4.86; Found: C, 81.10; H, 5.50; N, 4.68.

### **Spiro[(4R\*, 5R\*)-4-hydro-4-*p*-chlorophenyl-1,3-diphenyl- $\Delta^2$ -pyrazoline-5:3'-1'-(*p*-chlorobenzylidene)]tetral-2'-one (3d)**

Orange crystals (0.45g, 77%); mp 260°C ±2; <sup>1</sup>H NMR: δ 2.73 (d, 1H, *J*=15MHz, H-4'), 3.95 (d, 1H, *J*=15MHz, H-4'), 4.47 (s, 1H, H-4), 6.92-7.29 (m, 22H, H<sub>arom</sub>), 7.88 (s, 1H, H<sub>ethylenic</sub>); <sup>13</sup>C NMR : δ 32.9, 60.2, 75.2, 117.9, 121.4, 126.2, 126.4, 128.1, 128.2, 128.2, 128.8, 128.8, 129.9, 130.7, 130.9, 131.5, 132.2, 132.4, 133.4, 133.8, 134.9, 135.3, 137.8, 142.8, 147.1, 195.3; IR (ν<sub>max</sub>, cm<sup>-1</sup>): 1371, 1485, 1690 cm<sup>-1</sup>; Anal Calcd for C<sub>37</sub>H<sub>26</sub>N<sub>2</sub>Cl<sub>2</sub>O: C, 75.91; H, 4.48; N, 4.78; Found: C, 75.82; H, 4.39; N, 4.65.

**Spiro[(4R\*, 5R\*)-4-hydro-4-*p*-cyanophenyl-1,3-diphenyl-Δ<sup>2</sup>-pyrazoline-5:3'-1'-(*p*-cyanobenzylidene)]tetral-2'-one (3e)**

Orange crystals (0.47g, 83%); mp 260°C ±2; <sup>1</sup>H NMR : δ 2.69 (d, 1H, *J*=15MHz, H-4'), 3.97 (d, 1H, *J*=15MHz, H-4'), 4.51 (s, 1H, H-4), 6.23-7.60 (m, 22H, H<sub>arom</sub>), 7.87 (s, 1H, H<sub>ethylenic</sub>); <sup>13</sup>C NMR: δ : 33.0, 60.3, 75.3, 111.9, 112.6, 118.3, 122.0, 126.0, 126.8, 128.3, 128.4, 128.5, 128.7, 129.4, 129.9, 130.2, 131.0, 131.7, 131.8, 132.3, 132.5, 134.8, 136.9, 139.2, 139.8, 142.5, 146.5, 194.5; IR: (ν<sub>max</sub>, cm<sup>-1</sup>): 1371, 1486, 1691, 2240 cm<sup>-1</sup>; Anal Calcd for C<sub>39</sub>H<sub>26</sub>N<sub>4</sub>O: C, 82.66; H, 4.62; N, 9.89; Found: C, 82.53; H, 4.51; N, 9.78

**Spiro[(4R\*, 5R\*)-4-hydro-1,4-diphenyl-3-*p*-tolyl-Δ<sup>2</sup>-pyrazoline-5:3'-1'-(benzylidene)]tetral-2'-one (3f)**

Orange crystals (0.38g, 73%); mp 112°C ±2; <sup>1</sup>H NMR: δ 2.25 (s, 3H, CH<sub>3</sub>); 2.77 (d, 1H, *J*=15MHz, H-4'), 3.96 (d, 1H, *J*=15MHz, H-4'), 4.49 (s, 1H, H-4), 6.19-7.49 (m, 21H, H<sub>arom</sub>), 7.95 (s, 1H, H<sub>ethylenic</sub>); <sup>13</sup>C NMR : δ 21.2, 33.0, 61.0, 75.0, 117.6, 120.9, 126.1, 126.2, 127.7, 127.7, 128.1, 128.5, 128.7, 128.8, 129.1, 129.3, 129.6, 129.8, 131.0, 132.1, 134.0, 135.0, 135.2, 138.0, 139.0, 143.2, 147.8, 195.8; IR (ν<sub>max</sub>, cm<sup>-1</sup>): 1366, 1488, 1690 cm<sup>-1</sup>; Anal Calcd for C<sub>38</sub>H<sub>30</sub>N<sub>2</sub>O: C, 86.01; H, 5.70; N, 5.28; Found: C, 85.92; H, 5.59; N, 5.13.

**Spiro[(4R\*, 5R\*)-4-hydro-1-phenyl-3,4-*p*-tolyl-Δ<sup>2</sup>-pyrazoline-5:3'-1'-(*p*-tolylidene)]tetral-2'-one (3g)**

Orange crystals (0.40g, 70%); mp 198°C ±2; <sup>1</sup>H NMR : δ 2.26 (s, 3H, CH<sub>3</sub>), 2.28 (s, 3H, CH<sub>3</sub>), 2.39 (s, 3H, CH<sub>3</sub>), 2.77 (d, 1H, *J*=15MHz, H-4'), 3.93 (d, 1H, *J*=15MHz, H-4'), 4.47 (s, 1H, H-4), 6.25-7.50 (m, 21H, H<sub>arom</sub>), 7.91 (s, 1H, H<sub>ethylenic</sub>); <sup>13</sup>C NMR : δ 20.6, 20.7, 21.0, 32.4, 60.3, 74.6, 117.0, 120.2, 125.5, 125.7, 127.0, 127.5, 128.2, 128.3, 128.7, 129.3, 130.5, 130.7, 130.9, 131.7, 134.5, 136.8, 137.4, 138.6, 139.3, 142.8, 147.4, 195.5;

IR ( $\nu_{\max}$ ,  $\text{cm}^{-1}$ ): 1365, 1489, 1689  $\text{cm}^{-1}$ ; Anal Calcd for  $\text{C}_{40}\text{H}_{34}\text{N}_2\text{O}$ : C, 85.99; H, 6.13; N, 5.01; Found: C, 85.57; H, 5.98; N, 4.98.

**Spiro[(4R\*, 5R\*)-4-*p*-anisyl-4-hydro-1-phenyl-3-*p*-tolyl- $\Delta^2$ -pyrazoline-5:3'-1'-(*p*-anisylidene)]tetral-2'-one (3h)**

Orange crystals (0.45g, 77%); mp 146°C  $\pm$ 2;  $^1\text{H}$  NMR :  $\delta$  2.25 (s, 3H,  $\text{CH}_3$ ), 2.75 (d, 1H,  $J=15\text{MHz}$ , H-4'), 3.76 (s, 3H,  $\text{OCH}_3$ ), 3.85 (s, 3H,  $\text{OCH}_3$ ), 3.94 (d, 1H,  $J=15\text{MHz}$ , H4'), 4.43 (s, 1H, H-4), 6.26-7.57 (m, 21H,  $\text{H}_{\text{arom}}$ ), 7.88 (s, 1H,  $\text{H}_{\text{ethylenic}}$ );  $^{13}\text{C}$  NMR :  $\delta$  21.2, 32.9, 55.2, 55.3, 60.3, 75.1, 113.9, 117.4, 120.6, 126.0, 126.2, 126.25, 127.3, 127.4, 127.8, 128.7, 128.8, 129.1, 129.9, 130.0, 131.4, 131.7, 135.0, 137.9, 138.9, 143.2, 147.9, 159.0, 160.7, 195.8; IR ( $\nu_{\max}$ ,  $\text{cm}^{-1}$ ): 1368, 1487, 1692  $\text{cm}^{-1}$ ; Anal Calcd for  $\text{C}_{40}\text{H}_{34}\text{N}_2\text{O}_3$ : C, 81.33; H, 5.8; N, 4.74; found: C, 81.23; H, 5.74; N, 4.41.

**Spiro [(4R\*, 5R\*)-4-*p*-chlorophenyl-4-hydro-1-phenyl-3-*p*-tolyl- $\Delta^2$ -pyrazoline-5:3'-1'-(*p*-chlorobenzylidene)] tetral-2'-one (3i)**

Orange crystals (0.44 g, 75%); mp 258°C  $\pm$ 2;  $^1\text{H}$  NMR :  $\delta$  2.26 (s, 3H,  $\text{CH}_3$ ), 2.73 (d, 1H,  $J=15\text{MHz}$ , H-4'), 3.95 (d, 1H,  $J=15\text{MHz}$ , H-4'), 4.46 (s, 1H, H-4), 6.29-7.41 (m, 21H,  $\text{H}_{\text{arom}}$ ), 7.86 (s, 1H,  $\text{H}_{\text{ethylenic}}$ );  $^{13}\text{C}$  NMR :  $\delta$  20.7, 32.5, 59.8, 74.5, 117.3, 120.7, 125.6, 125.9, 127.6, 128.2, 128.2, 128.3, 128.4, 129.4, 130.2, 130.4, 131.8, 132.0, 132.9, 133.3, 134.4, 134.7, 137.8, 142.5, 146.7, 194.9; IR ( $\nu_{\max}$ ,  $\text{cm}^{-1}$ ): 1370, 1488, 1691  $\text{cm}^{-1}$ ; Anal Calcd for  $\text{C}_{38}\text{H}_{28}\text{N}_2\text{Cl}_2\text{O}$ : C, 76.13; H, 4.71; N, 4.67; Found: C, 75.99; H, 4.52; N, 4.57.

**Spiro [(4R\*, 5R\*)-4-*p*-cyanophenyl-4-hydro-1-phenyl-3-*p*-tolyl- $\Delta^2$ -pyrazoline-5:3'-1'-(*p*-cyanobenzylidene)]tetral-2'-one (3j)**

Orange crystals (0.42g, 72%); mp 176°C  $\pm$ 2;  $^1\text{H}$  NMR :  $\delta$  2.25 (s, 3H,  $\text{CH}_3$ ), 2.69 (d, 1H,  $J=15\text{MHz}$ , H-4'), 3.97 (d, 1H,  $J=15\text{MHz}$ , H-4'), 4.51 (s, 1H, H-4), 6.23-7.59 (m, 21H,  $\text{H}_{\text{arom}}$ ), 7.87 (s, 1H,  $\text{H}_{\text{ethylenic}}$ );  $^{13}\text{C}$  NMR :  $\delta$  20.7, 32.5, 60.0, 74.6, 117.5, 117.8, 119.6, 121.3, 124.4, 125.5, 125.9, 126.3, 128.2, 128.3, 128.6, 128.8, 129.0, 129.5, 129.7, 131.8, 133.4, 136.3, 138.2, 142.2, 146.2, 194.1; IR ( $\nu_{\max}$ ,  $\text{cm}^{-1}$ ): 1370, 1487, 1692, 2239  $\text{cm}^{-1}$ ; Anal Calcd for  $\text{C}_{40}\text{H}_{28}\text{N}_4\text{O}$ : C, 82.74; H, 4.86; N, 9.65; Found: C, 82.62; H, 4.72; N, 9.54.

**Spiro [(4S\*, 5S\*, 4'R\*, 5'R\*)-4-hydro-1,3,4-triphenyl- $\Delta^2$ -pyrazoline-5:1'''.3''':5']tetral-2''-one (4a)**

Yellow crystals (0.59 g, 84%); mp > 260 °C; <sup>1</sup>H NMR : δ 3.39 (q, 2H, *J* = 15MHz, CH<sub>2</sub>), 4.9 (s, 1H, H-4), 5.08 (s, 1H, H-4'), 6.33-7.7 (m, 32H, H<sub>arom</sub>); <sup>13</sup>C NMR : δ 39.9, 59.0, 66.4, 74.5, 83.8, 116.3, 119.7, 124.6, 124.7, 126.1, 126.2, 126.6, 127.8, 127.9, 128.1, 128.4, 128.9, 129.3, 129.9, 131.5, 131.9, 133.5, 135.4, 143.3, 144.0, 146.1, 149.8, 200.8; IR (ν<sub>max</sub>, cm<sup>-1</sup>): 1367, 1485, 1691 cm<sup>-1</sup>; Anal Calcd for C<sub>50</sub>H<sub>38</sub>N<sub>4</sub>O: C, 84.48; H, 5.39; N, 7.88; Found: C, 84.31; H, 5.28; N, 7.65.

**Spiro [(4S\*, 5S\*, 4'R\*, 5'R\*)-4-hydro-1,3-diphenyl-4-*p*-tolyl-Δ<sup>2</sup>-pyrazoline-5:1''-3''-5'] tetral-2''-one (4b)**

Yellow crystals (0.62g, 85%); mp > 260 °C; <sup>1</sup>H NMR : δ 1.99 (s, 3H, CH<sub>3</sub>), 2.37 (s, 3H, CH<sub>3</sub>), 3.15 (d, 1H, *J*=18MHz, H-4''), 3.34 (d, 1H, *J*=18MHz, H-4''), 4.78 (s, 1H, H-4), 4.93 (s, 1H, H-4'), 6.22-7.6 (m, 32H, H<sub>arom</sub>); <sup>13</sup>C NMR : δ 20.9, 21.3, 39.4, 58.8, 66.2, 74.4, 83.8, 116.3, 119.5, 124.5, 124.6, 126.1, 126.2, 126.6, 127.7, 128.0, 128.3, 128.4, 128.4, 129.0, 129.3, 130.1, 130.4, 131.6, 132.1, 132.3, 133.5, 137.5, 138.7, 143.4, 144.1, 146.2, 149.9, 200.9; IR (ν<sub>max</sub>, cm<sup>-1</sup>): 1368, 1486, 1691 cm<sup>-1</sup>; Anal Calcd for C<sub>52</sub>H<sub>42</sub>N<sub>4</sub>O: C, 84.52; H, 5.73; N, 7.58; found: C, 84.32; H, 5.59; N, 7.43.

**Spiro [(4S\*, 5S\*, 4'R\*, 5'R\*)-4-*p*-anisyl-4-hydro-1,3-diphenyl-Δ<sup>2</sup>-pyrazoline-5:1''-3''-5'] tetral-2''-one (4c)**

Yellow crystals (0.63 g, 83%); mp >260 °C; <sup>1</sup>H NMR : δ 3.25 (d, 1H, *J*=15MHz, H-4''), 3.43 (d, 1H, *J*=15MHz, H-4''); 3.60 (s, 3H, OCH<sub>3</sub>); 3.91 (s, 3H, OCH<sub>3</sub>); 4.86 (s, 1H, H-4); 5.01 (s, 1H, H-4'); 6.29-7.7 (m, 32H, H<sub>arom</sub>); <sup>13</sup>C NMR : δ 38.9, 54.5, 54.9, 57.9, 65.3, 66.4, 73.9, 83.3, 113.3, 113.9, 115.1, 115.7, 119.0, 124.0, 124.1, 125.0, 125.6, 125.8, 126.1, 126.8, 127.4, 127.6, 127.8, 128.0, 128.7, 129.6, 130.3, 131.0, 131.5, 132.9, 142.8, 143.6, 145.7, 149.6, 158.5, 159.3, 200.5; IR (ν<sub>max</sub>, cm<sup>-1</sup>): 1368, 1485, 1690 cm<sup>-1</sup>; Anal Calcd for C<sub>52</sub>H<sub>42</sub>N<sub>4</sub>O<sub>3</sub>: C, 81.02; H, 5.49; N, 7.27; Found: C, 80.89; H, 5.34; N, 6.97.

**Spiro [(4S\*, 5S\*, 4'R\*, 5'R\*)-4-*p*-chlorophenyl-4-hydro-1,3-diphenyl-Δ<sup>2</sup>-pyrazoline-5:1''-3''-5'] tetral-2''-one (4d)**

Yellow crystals (0.63 g, 81%); mp > 260 °C; <sup>1</sup>H NMR : δ 3.25 (d, 1H, *J*=18 MHz, H-4''), 3.34 (d, 1H, *J*=18 MHz, H-4''), 4.77 (s, 1H, H-4), 4.99 (s, 1H, H-4'), 6.26-7.63 (m, 32H, H<sub>arom</sub>); <sup>13</sup>C NMR : δ 39.3, 58.3, 65.6, 74.2, , 83.7, 116.3, 119.9, 124.7, 125.0, 126.5, 126.7, 128.1, 128.2, 128.4, 128.6, 128.7, 129.2, 129.7, 130.8, 131.1, 131.6, 131.9, 133.0, 133.8,

133.9, 134.9, 143.1, 143.7, 145.6, 149.5, 200.4; IR ( $\nu_{\max}$ ,  $\text{cm}^{-1}$ ): 1369, 1487, 1692  $\text{cm}^{-1}$ ; Anal Calcd for:  $\text{C}_{50}\text{H}_{36}\text{Cl}_2\text{N}_4\text{O}$ : C, 77.02; H, 4.65; N, 7.19; Found: C, 76.95; H, 4.55; N, 7.04.

**Spiro [(4S\*, 5S\*, 4'R\*, 5'R\*)-4-*p*-cyanophenyl-4-hydro-1,3-diphenyl- $\Delta^2$ -pyrazoline-5:1'''.3''':5'] tetral-2''-one (4e)**

Yellow crystals (0.63g, 83%); mp > 260°C;  $^1\text{H}$  NMR :  $\delta$  3.29 (s, 2H,  $\text{CH}_2$ ), 4.79 (s, 1H, H-4), 5.04 (s, 1H, H-4'), 6.21-7.59 (m, 32H,  $\text{H}_{\text{arom}}$ ),  $^{13}\text{C}$  NMR :  $\delta$  38.1, 58.6, 65.8, 74.0, 83.7, 112.1, 113.4, 116.3, 117.9, 120.3, 124.9, 125.3, 125.8, 126.4, 127.0, 128.2, 128.3, 128.4, 128.6, 129.1, 129.2, 129.3, 130.6, 130.9, 131.2, 132.3, 132.6, 140.6, 143.4, 144.9, 200.1; IR ( $\nu_{\max}$ ,  $\text{cm}^{-1}$ ): 1370, 1487, 1692, 2240  $\text{cm}^{-1}$ ; Anal Calcd for:  $\text{C}_{52}\text{H}_{36}\text{N}_6\text{O}$ : C, 82.08; H, 4.77; N, 11.05; Found: C, 81.98; H, 4.68; N, 10.86.

**Spiro [(4S\*, 5S\*, 4'R\*, 5'R\*)-4-hydro-1,4-diphenyl-3-*p*-tolyl- $\Delta^2$ -pyrazoline-5:1'''.3''':5'] tetral-2''-one (4f)**

Yellow crystals (0.62g, 85%); mp > 260 °C;  $^1\text{H}$  NMR:  $\delta$  2.17(s, 3H,  $\text{CH}_3$ ), 2.29 (s, 3H,  $\text{CH}_3$ ), 3.23 (d, 1H,  $J=18$  MHz, H-4''), 3.3 (d, 1H,  $J=18$  MHz, H-4''), 4.79 (s, 1H, H-4), 4.97 (s, 1H, H-4'), 6.25-7.51 (m, 30H,  $\text{H}_{\text{arom}}$ );  $^{13}\text{C}$  NMR :  $\delta$  21.3, 21.4, 39.4, 59.0, 66.5, 74.4, 83.7, 116.3, 119.5, 124.6, 124.6, 125.2, 126.1, 126.17, 126.6, 127.7, 127.8, 128.1, 128.2, 128.3, 128.7, 128.8, 128.8, 129.0, 129.2, 129.3, 129.9, 130.1, 133.5, 133.6, 135.5, 138.3, 138.6, 143.5, 144.1, 146.3, 149.9, 201.0; IR ( $\nu_{\max}$ ,  $\text{cm}^{-1}$ ) : 1368, 1485, 1690  $\text{cm}^{-1}$ ; Anal Calcd for  $\text{C}_{52}\text{H}_{42}\text{N}_4\text{O}$ : C, 84.52; H, 5.73; N, 7.58; Found: C, 84.40; H, 5.65; N, 7.46.

**Spiro [(9S\*, 10R\*, 7R\*, 10R\*)-4-hydro-1-phenyl-3,4-*p*-tolyl- $\Delta^2$ -pyrazoline-5:1'''.3''':5'] tetral-2''-one (4g)**

Yellow crystals (0.68 g, 89%); mp > 260 °C;  $^1\text{H}$  NMR :  $\delta$  2.09(s, 3H,  $\text{CH}_3$ ), 2.26 (s, 3H,  $\text{CH}_3$ ), 2.36 (s, 3H,  $\text{CH}_3$ ), 2.48 (s, 3H,  $\text{CH}_3$ ), 3.25 (d, 1H,  $J=18$  MHz, H-4''), 3.43 (d, 1H,  $J=18$  MHz, H-4''), 4.88 (s, 1H, H-4), 5.03 (s, 1H, H-4'), 6.33-7.61 (m, 30H,  $\text{H}_{\text{arom}}$ );  $^{13}\text{C}$  NMR :  $\delta$  20.4, 20.7, 20.8, 20.9, 38.9, 58.3, 65.8, 73.8, 83.2, 115.7, 118.9, 124.0, 124.8, 125.6, 126.1, 127.2, 127.5, 127.7, 128.3, 128.5, 128.7, 128.8, 129.7, 130.1, 131.9, 136.9, 137.7, 138.1, 143.1, 143.7, 145.9, 200.5; IR ( $\nu_{\max}$ ,  $\text{cm}^{-1}$ ) : 1366, 1486, 1689  $\text{cm}^{-1}$ ; Anal Calcd for  $\text{C}_{54}\text{H}_{46}\text{N}_4\text{O}$ : C, 84.56; H, 6.05; N, 7.30; Found: C, 84.49; H, 5.94; N, 6.93

**Spiro [(4S\*, 5S\*, 4'R\*, 5'R\*)-4-*p*-anisyl-4-hydro-1-phenyl-3-*p*-tolyl- $\Delta^2$ -pyrazoline-5:1'''.3''':5'] tetral-2''-one (4h)**

Yellow crystals(0.68 g, 86%); mp > 260 °C; <sup>1</sup>H NMR : δ 2.26 (s, 3H, CH<sub>3</sub>), 2.35 (s, 3H, CH<sub>3</sub>), 3.39 (d, 1H, *J*=15 MHz, H-4''), 3.47 (d, 1H, *J*=15 MHz, H-4''), 3.60 (s, 3H, OCH<sub>3</sub>), 3.91 (s, 3H, OCH<sub>3</sub>), 4.85 (s, 1H, H-4); 5.00 (s, 1H, H-4'), 6.32-7.6 (m, 30H, H<sub>arom</sub>), <sup>13</sup>C NMR : δ 21.2, 21.3, 39.4, 55.0, 55.3, 58.5, 65.9, 74.3, 83.8, 113.8, 114.4, 115.5, 116.2, 119.4, 124.4, 124.5, 125.7, 126.0, 126.2, 126.6, 127.4, 127.8, 128.0, 128.4, 128.8, 129.2, 129.2, 129.3, 130.3, 130.8, 133.5, 138.3, 138.5, 143.5, 144.28, 146.4, 150.1, 159.0, 159.8, 201.1; IR (ν<sub>max</sub>, cm<sup>-1</sup>): 1368, 1486, 1690 cm<sup>-1</sup>; Anal Calcd for C<sub>54</sub>H<sub>46</sub>N<sub>4</sub>O<sub>3</sub>: C, 81.18; H, 5.80; N, 7.01; Found: C, 81.12; H, 5.75; N, 6.93.

**Spiro [(4S\*, 5S\*, 4'R\*, 5'R\*)-4-*p*-chlorophenyl-4-hydro-1-diphenyl-3-*p*-tolyl-Δ<sup>2</sup>-pyrazoline-5:1''-3'':5')] tetral-2''-one (4i)**

Yellow crystals(0.71g, 88%); mp > 260 °C; <sup>1</sup>H NMR : δ 2.27 (s, 3H, CH<sub>3</sub>), 2.37 (s, 3H, CH<sub>3</sub>), 3.30 (d, 1H, *J*=18MHz, H-4''), 3.32 (d, 1H, *J*=18MHz, H-4''), 4.78 (s, 1H, H-4), 5.01 (s, 1H, H-4'), 6.28-7.58 (m, 32H, H<sub>arom</sub>); <sup>13</sup>C NMR : δ 20.8, 20.9, 38.9, 57.8, 65.2, 73.6, 83.1, 115.7, 119.2, 124.2, 124.4, 125.4, 126.0, 126.1, 127.6, 127.7, 127.8, 127.9, 128.2, 128.3, 128.5, 128.6, 128.9, 129.2, 130.3, 131.5, 132.5, 133.3, 133.5, 134.3, 138.2, 138.4, 142.7, 143.4, 145.3, 149.5, 200.4; IR (ν<sub>max</sub>, cm<sup>-1</sup>): 1389, 1492, 1693 cm<sup>-1</sup>; Anal Calcd for C<sub>52</sub>H<sub>40</sub>Cl<sub>2</sub>N<sub>4</sub>O: C, 77.32; H, 4.99; N, 6.94; Found: C, 77.27; H, 4.94; N, 6.89

**Spiro [(4S\*, 5S\*, 4'R\*, 5'R\*)-4-*p*-cyanophenyl-4-hydro-1-diphenyl-3-*p*-tolyl-Δ<sup>2</sup>-pyrazoline-5:1''-3'':5')] tetral-2''-one (4j)**

Yellow crystals(0.67g, 85%); mp > 260 °C; <sup>1</sup>H NMR : δ 2.27 (s, 3H, CH<sub>3</sub>), 2.37 (s, 3H, CH<sub>3</sub>), 3.29 (s, 2H, CH<sub>2</sub>), 4.79 (s, 1H, H-4), 5.05 (s, 1H, H-4'), 6.29-7.86 (m, 32H, H<sub>arom</sub>); <sup>13</sup>C NMR : δ 21.3, 21.3, 39.4, 58.6, 65.9, 73.9, 83.6, 112.0, 113.1, 116.2, 118.0, 120.1, 124.9, 125.3, 125.7, 126.4, 127.0, 127.8, 128.2, 128.3, 128.4, 128.5, 128.6, 129.1, 129.3, 129.5, , 132.3, 132.6, 138.7, 139.1, 139.4, 140.8, 142.8, 143.5, 145.1, 149.3, 199.8; IR (ν<sub>max</sub>, cm<sup>-1</sup>): 1370, 1488, 1692, 2238 cm<sup>-1</sup>; Anal Calcd for C<sub>54</sub>H<sub>40</sub>N<sub>6</sub>O: C, 82.21; H, 5.11; N, 10.65; Found: C, 82.09; H, 5.02; N, 10.52.

## 2. $^1\text{H}$ and $^{13}\text{C}$ -NMR Spectra of compounds **3** and **4**

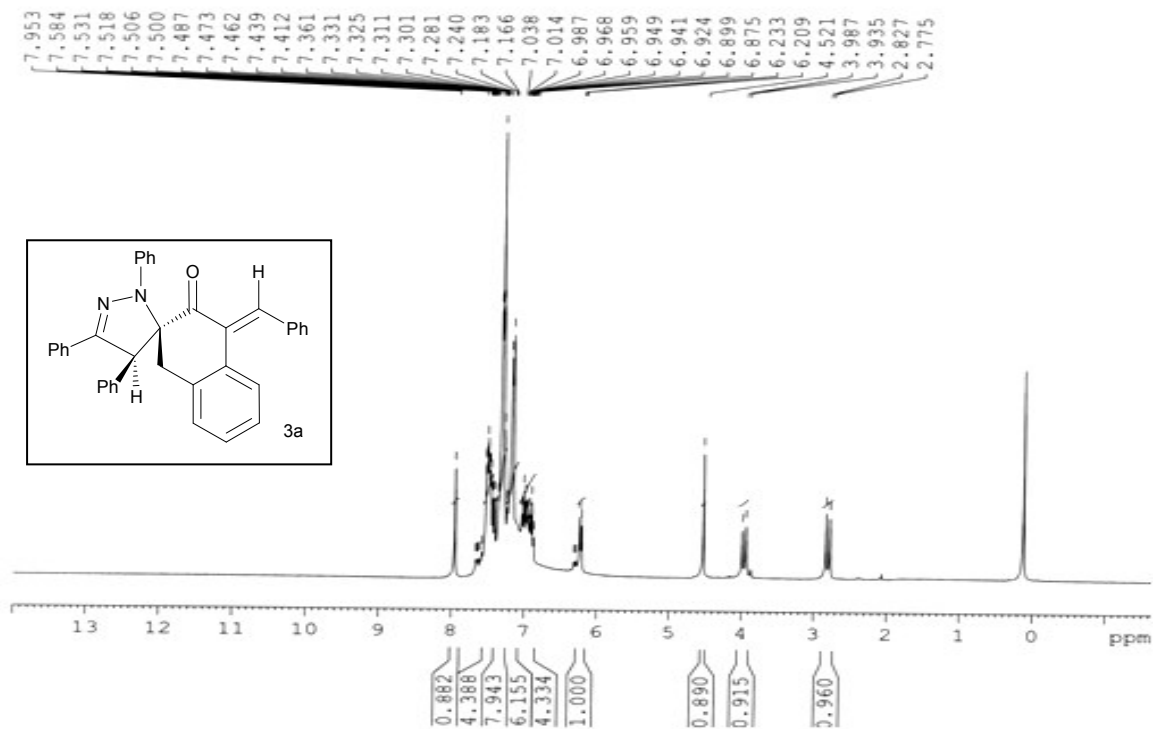

**Fig 1.**  $^1\text{H}$  NMR Spectrum of **3a** in  $\text{CDCl}_3$

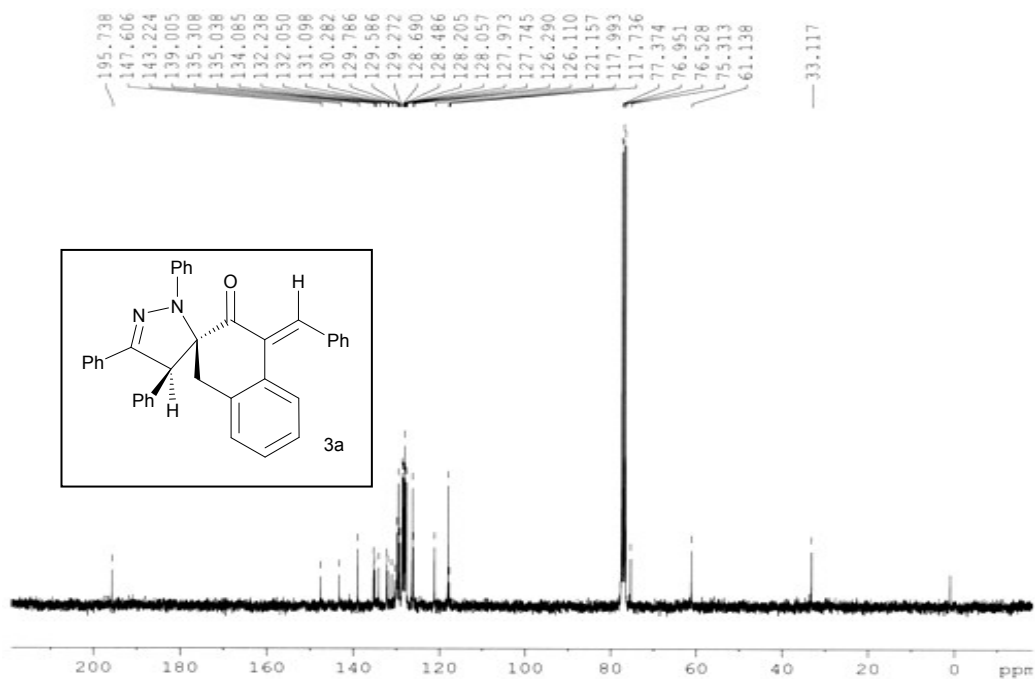

**Fig 2.**  $^{13}\text{C}$  NMR Spectrum of **3a** in  $\text{CDCl}_3$



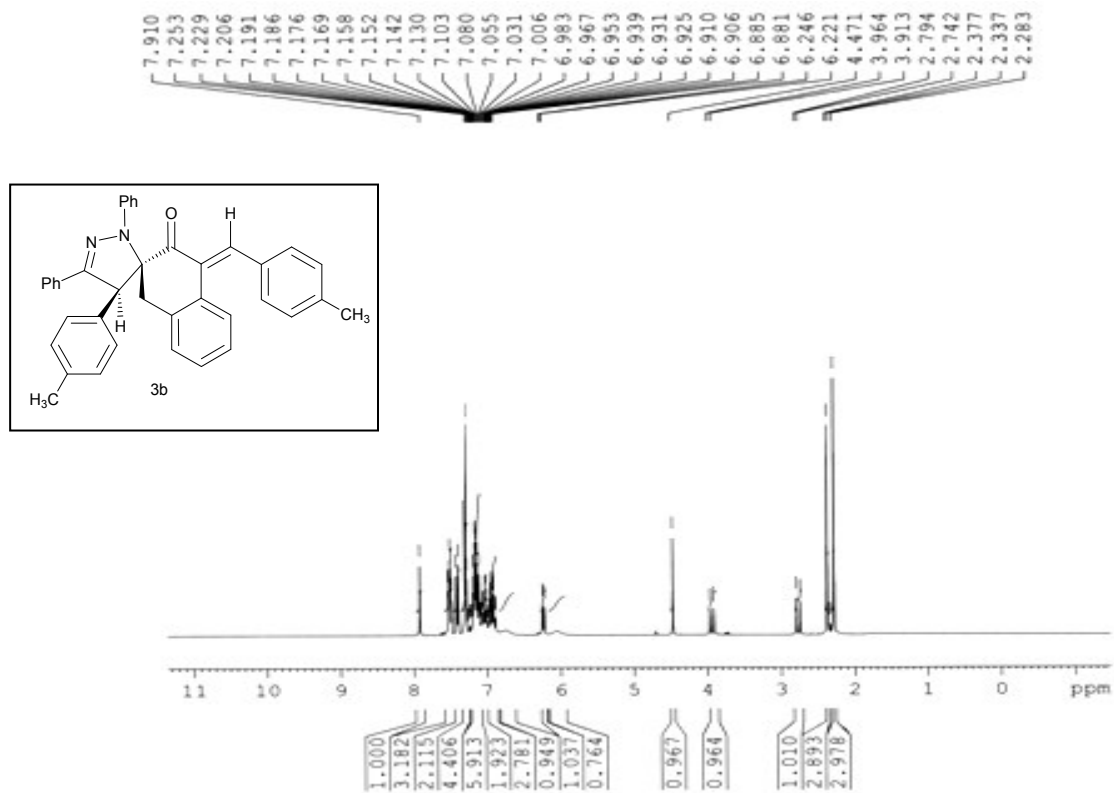

**Fig 3.** <sup>1</sup>H NMR Spectrum of **3b** in CDCl<sub>3</sub>

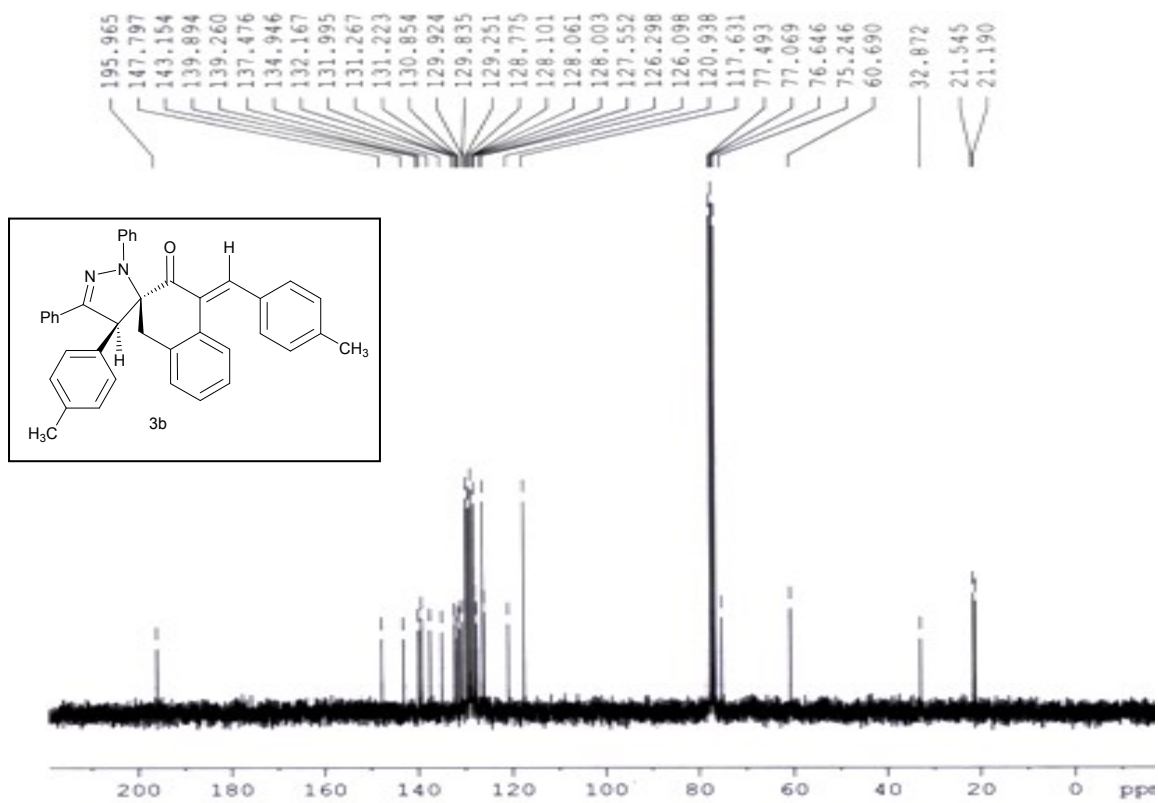

**Fig 4.** <sup>13</sup>C NMR Spectrum of **3b** in CDCl<sub>3</sub>

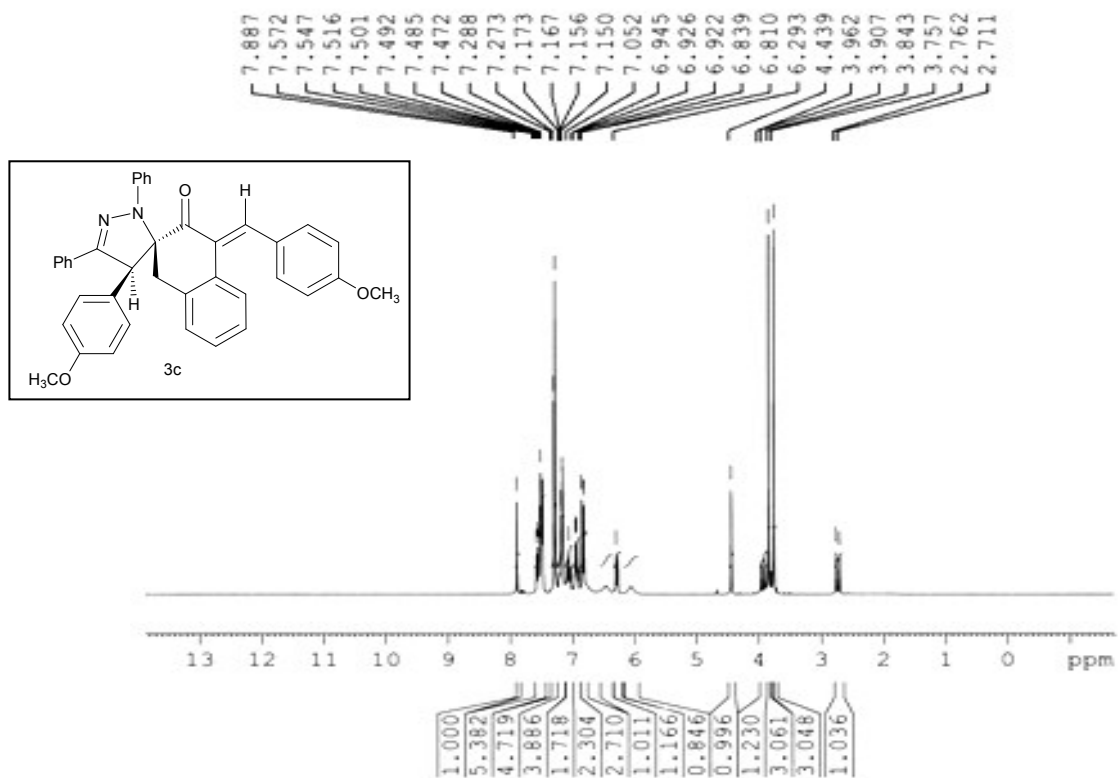

**Fig 5.** <sup>1</sup>H NMR Spectrum of **3c** in CDCl<sub>3</sub>

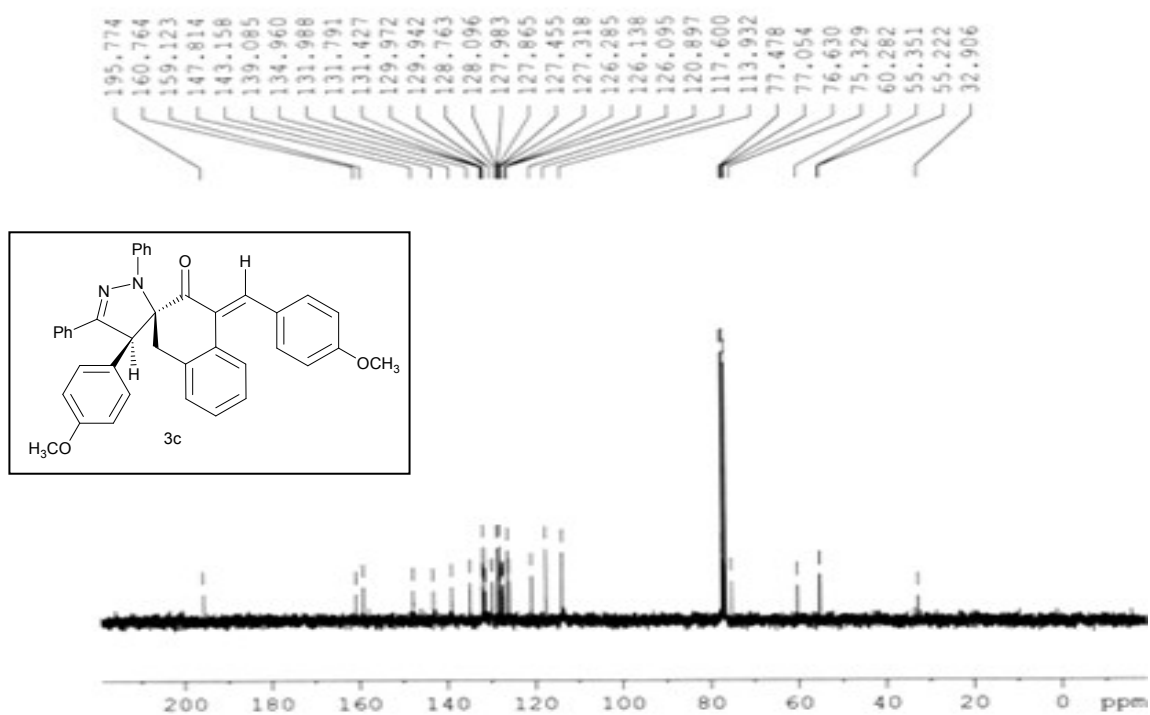

**Fig 6.** <sup>13</sup>C NMR Spectrum of **3c** in CDCl<sub>3</sub>

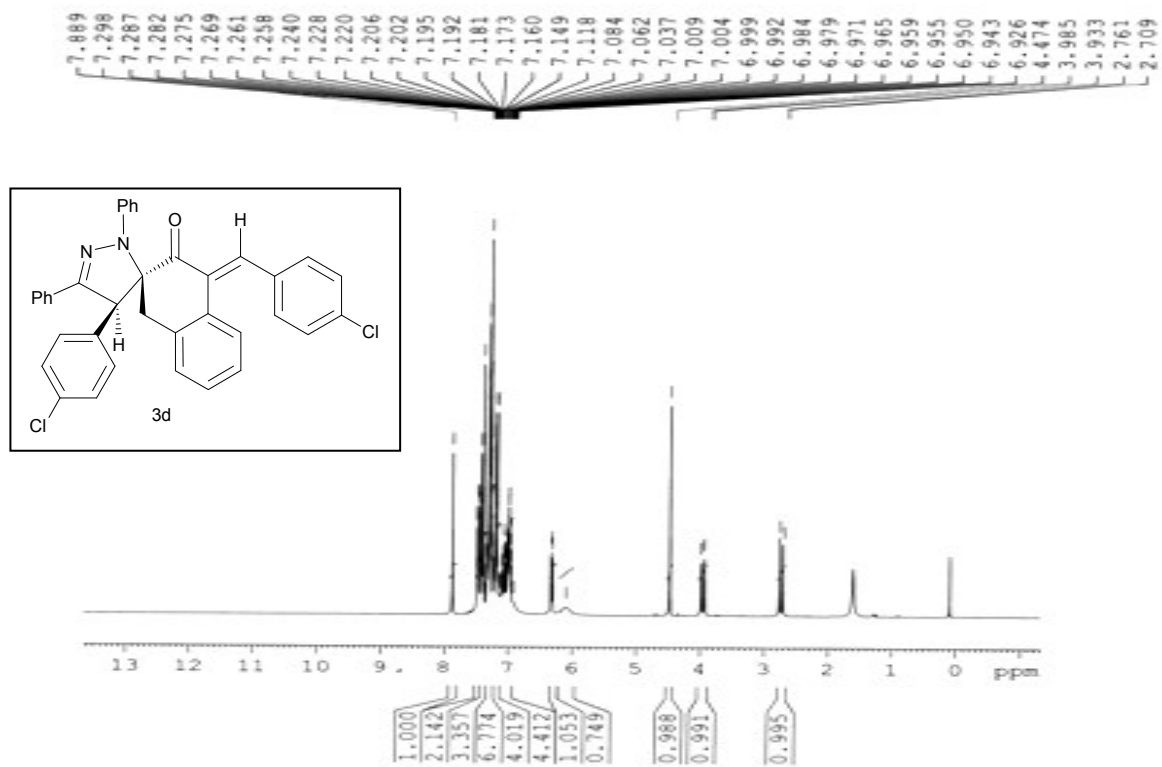

**Fig 7.** <sup>1</sup>H NMR Spectrum of **3d** in CDCl<sub>3</sub>

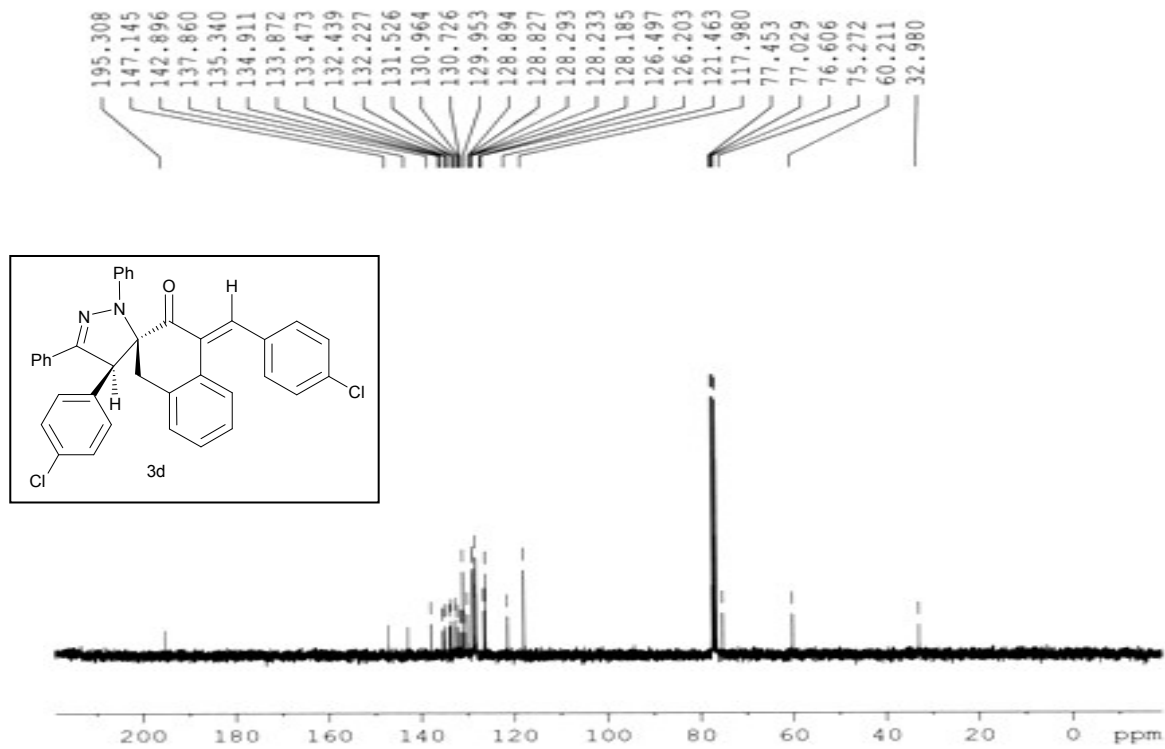

**Fig 8.** <sup>13</sup>C NMR Spectrum of **3d** in CDCl<sub>3</sub>

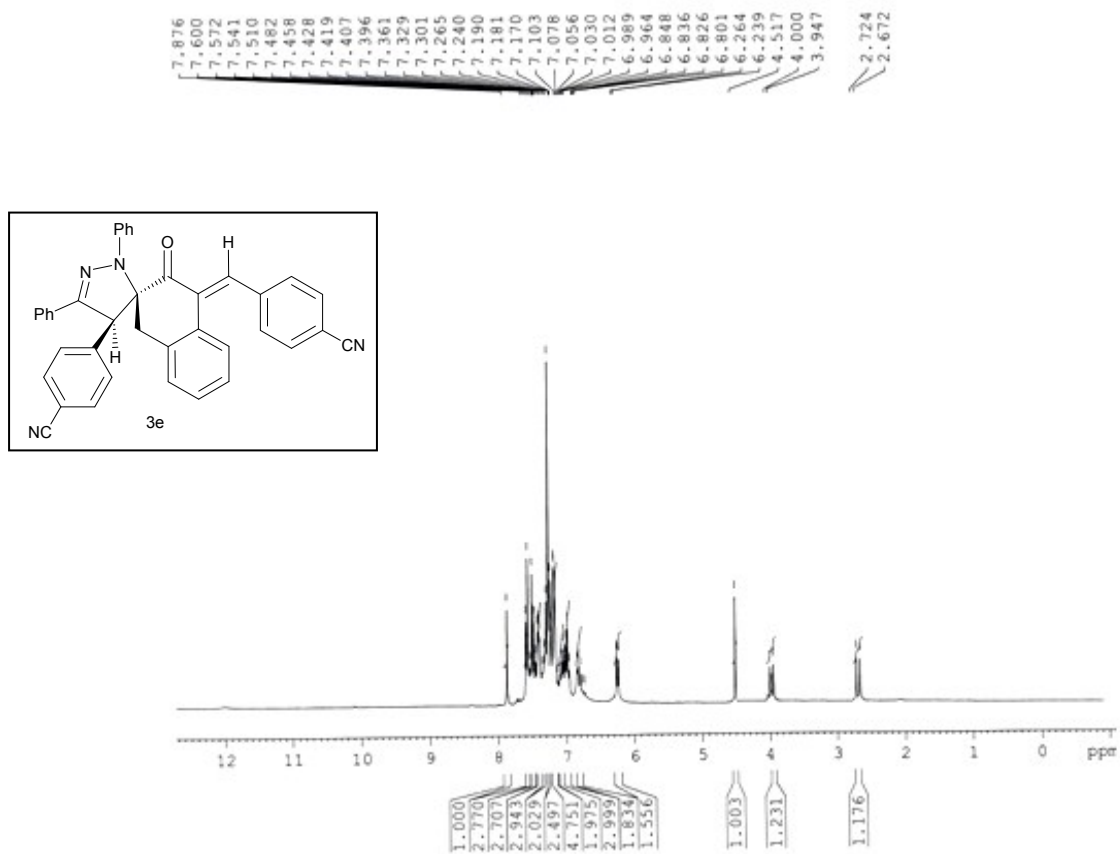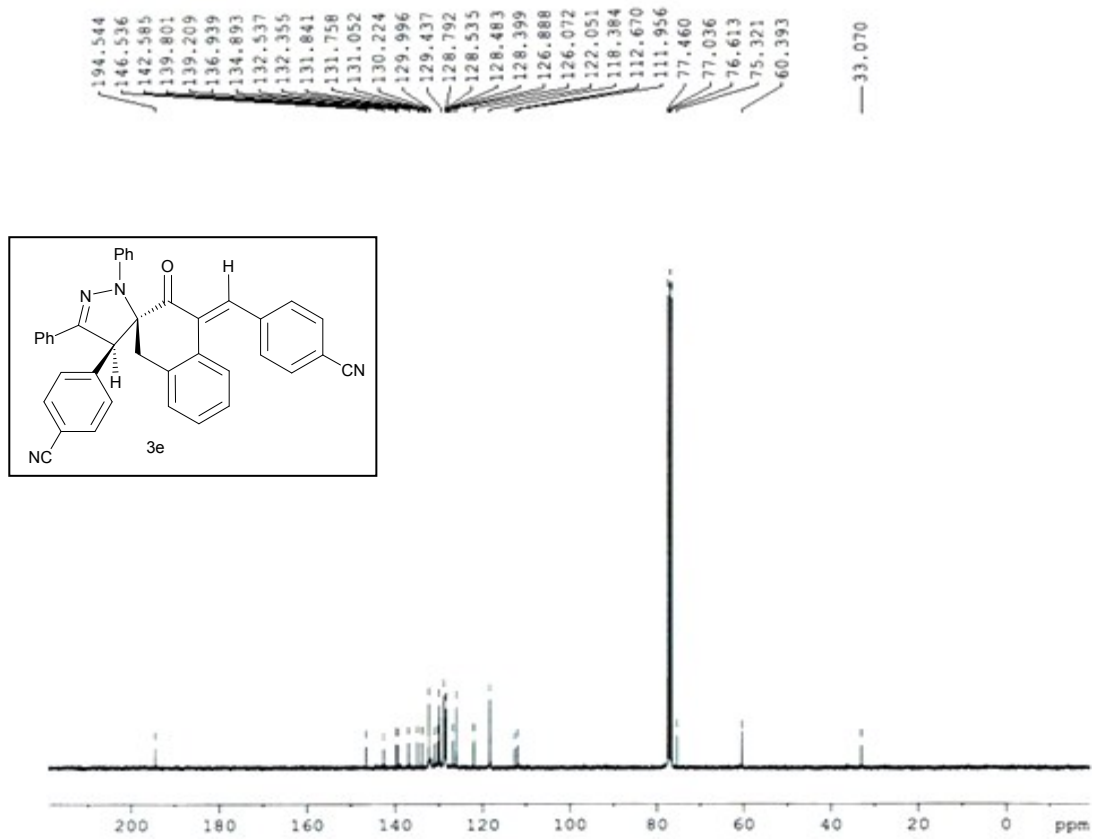

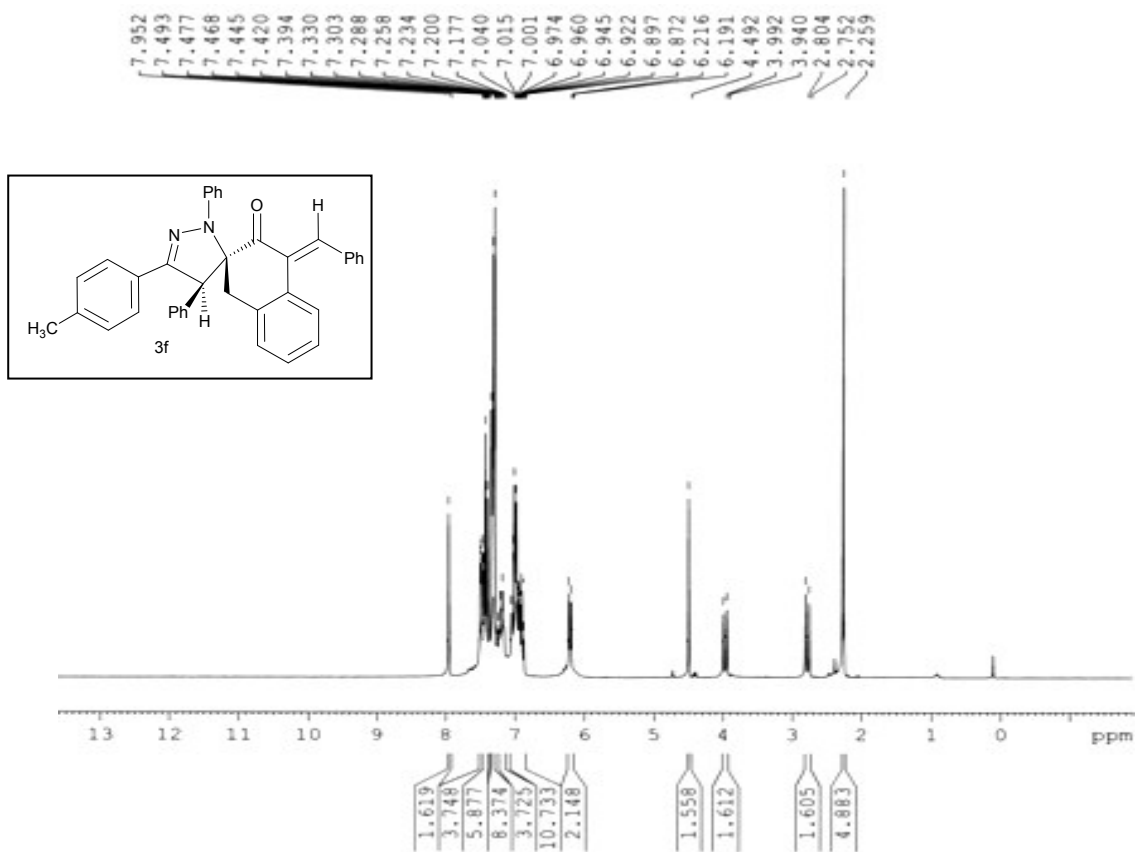

**Fig 11.** <sup>1</sup>H NMR Spectrum of **3f** in CDCl<sub>3</sub>

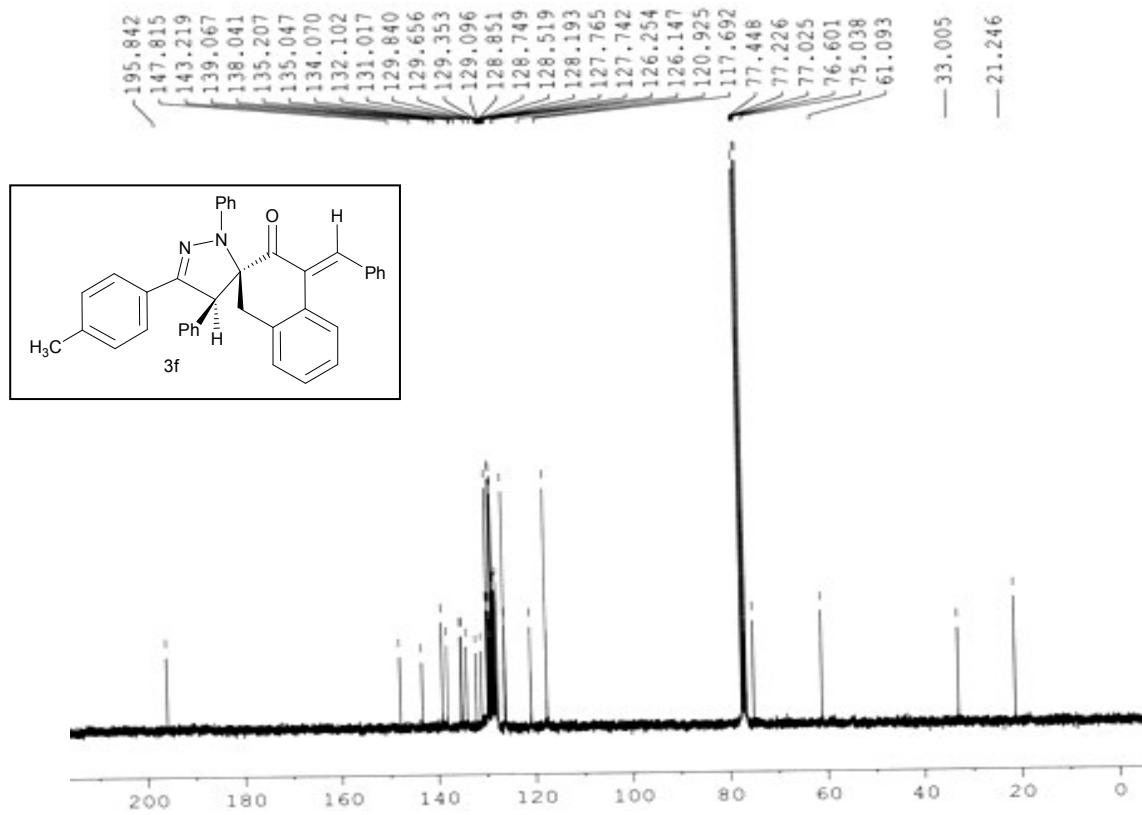

**Fig 12.** <sup>13</sup>C NMR Spectrum of **3f** in CDCl<sub>3</sub>

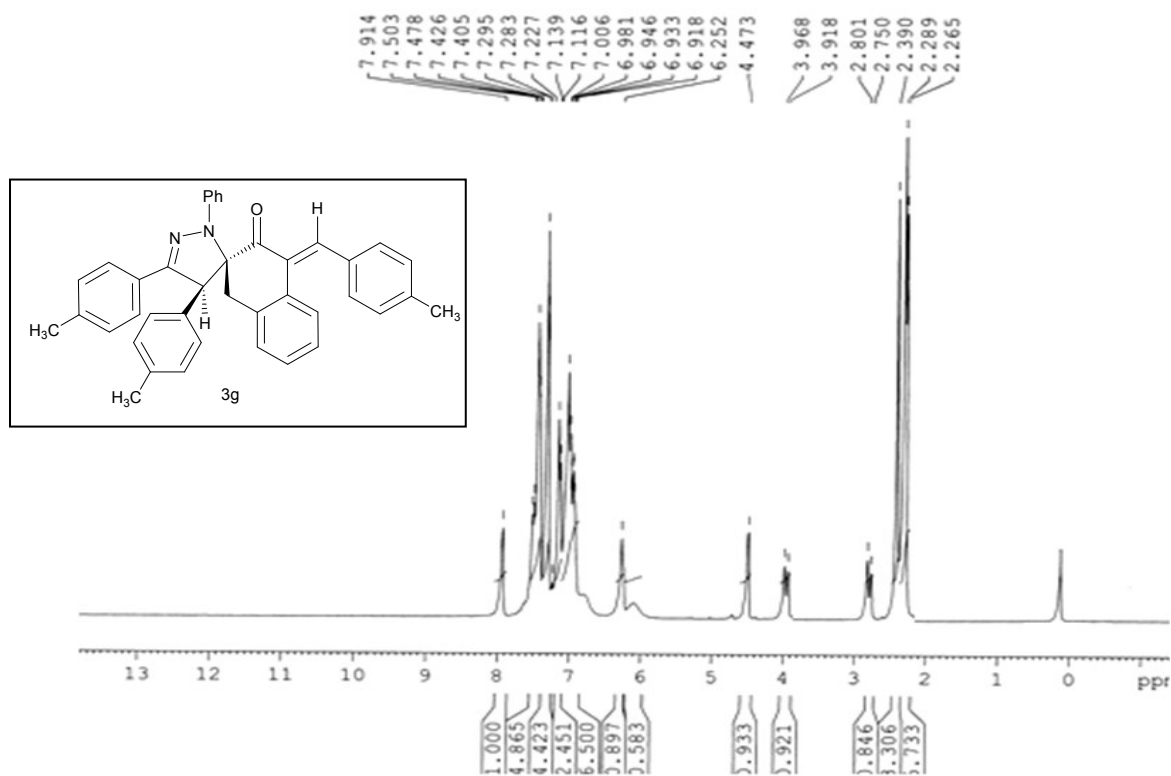

**Fig 13.** <sup>1</sup>H NMR Spectrum of **3g** in CDCl<sub>3</sub>

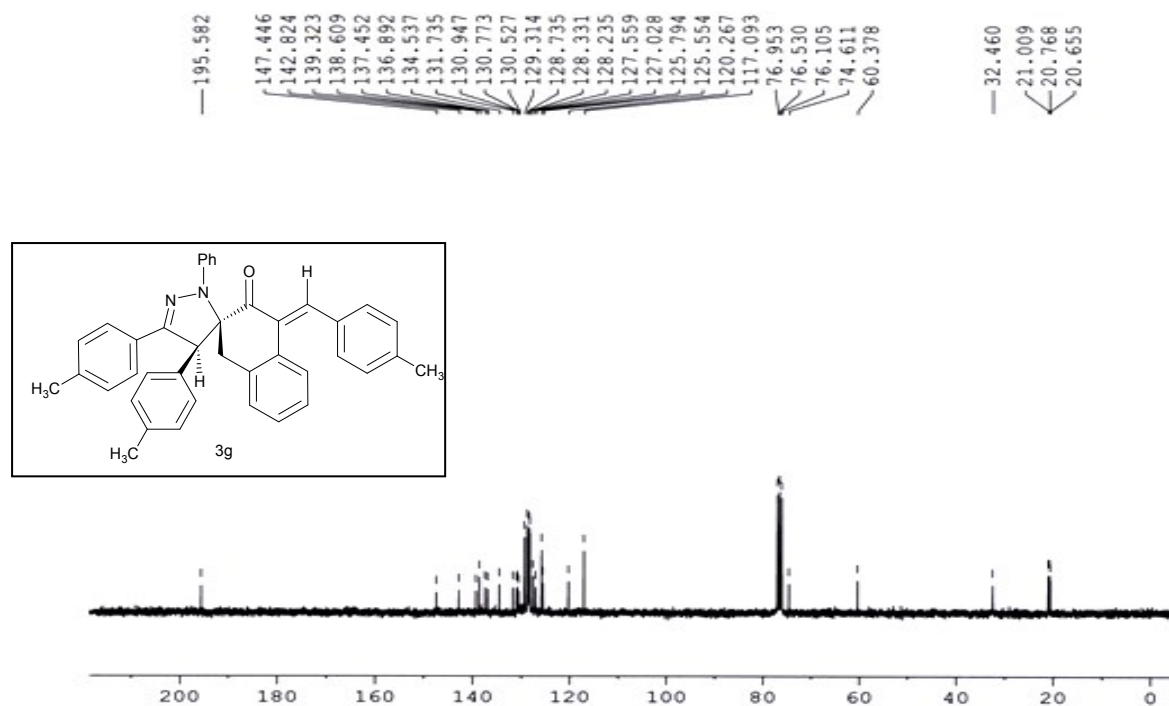

**Fig 14.** <sup>13</sup>C NMR Spectrum of **3g** in CDCl<sub>3</sub>

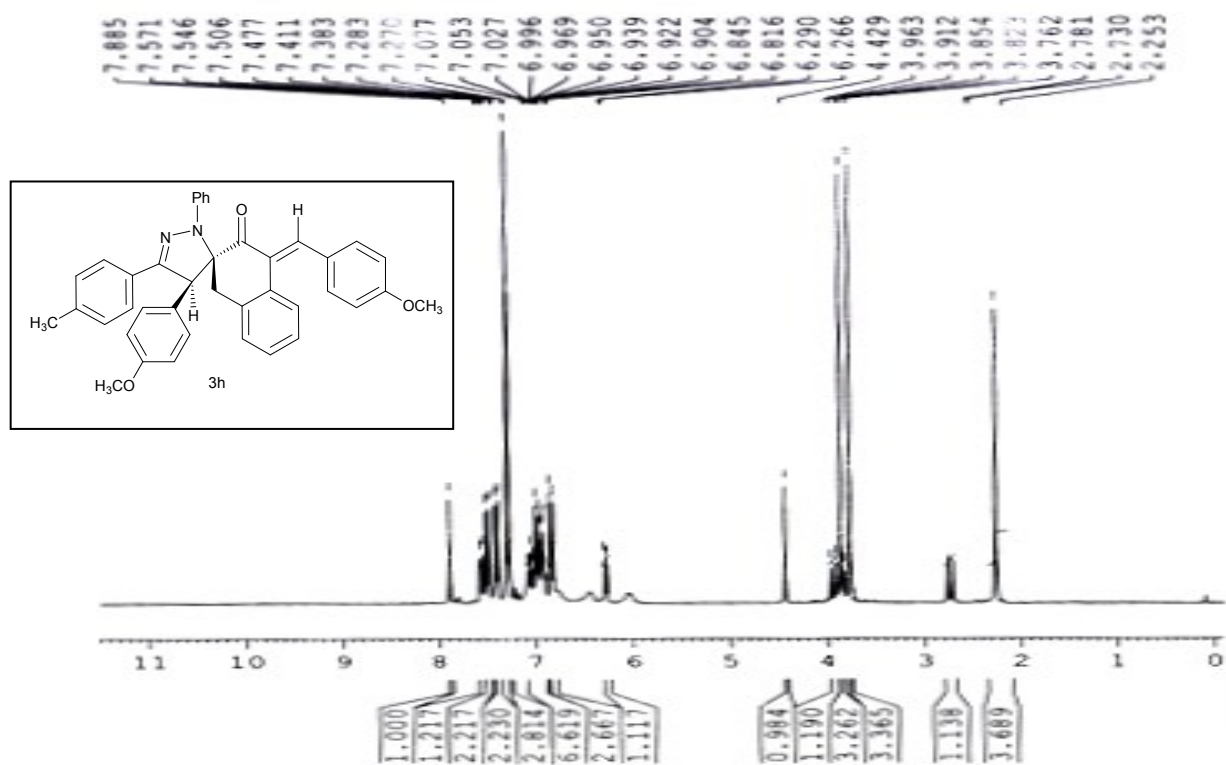

**Fig 15.** <sup>1</sup>H NMR Spectrum of **3h** in CDCl<sub>3</sub>

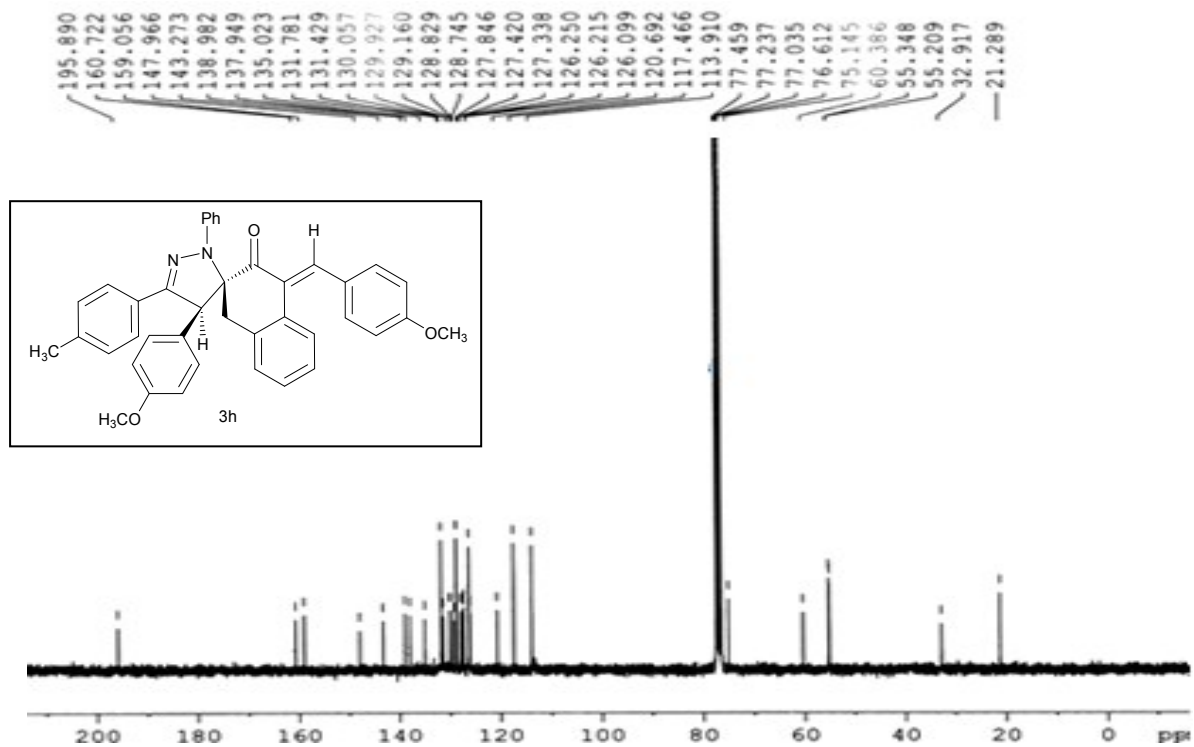

**Fig 16.** <sup>13</sup>C NMR Spectrum of **3h** in CDCl<sub>3</sub>

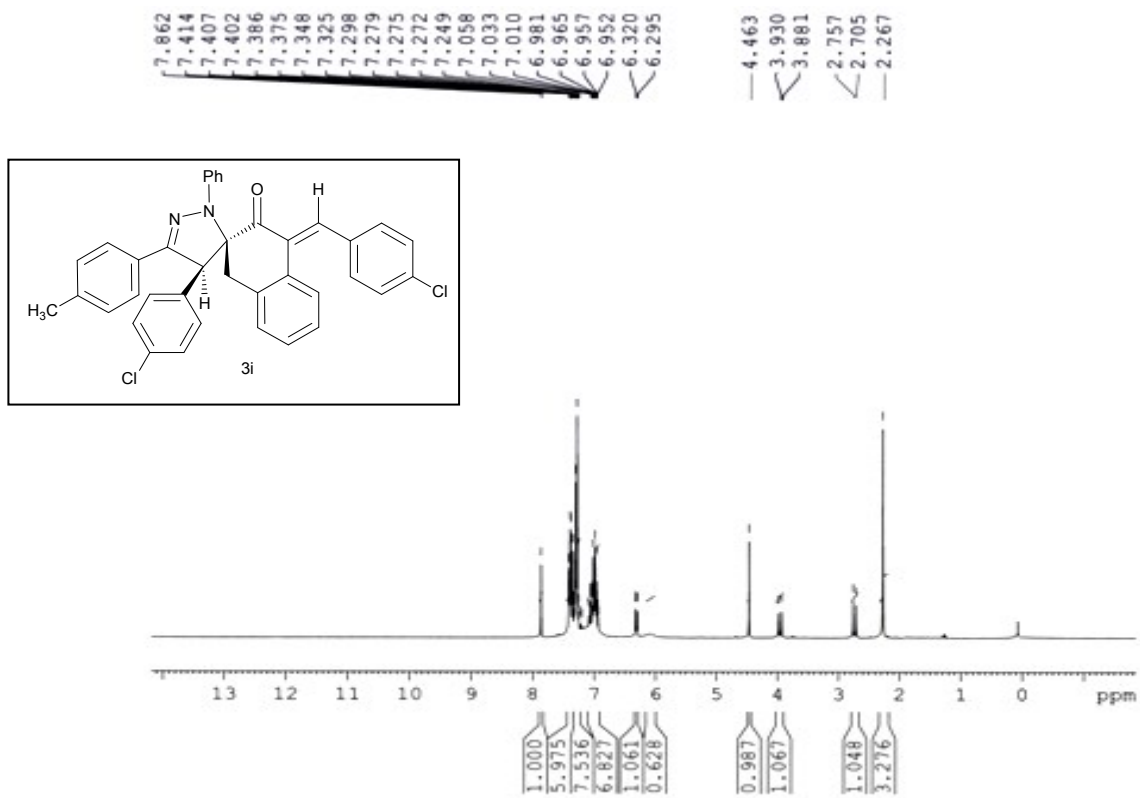

**Fig 17.**  $^1\text{H}$  NMR Spectrum of **3i** in CDCl<sub>3</sub>

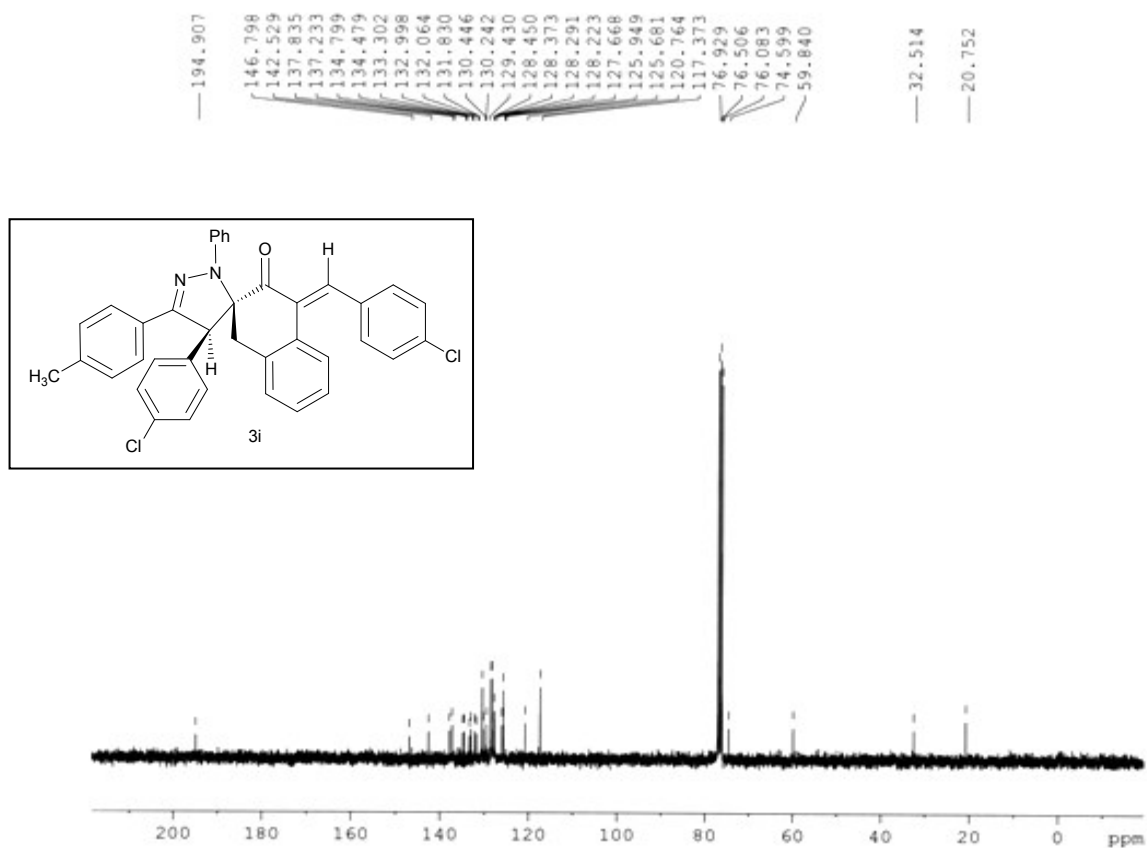

**Fig 18.**  $^{13}\text{C}$  NMR Spectrum of **3i** in CDCl<sub>3</sub>



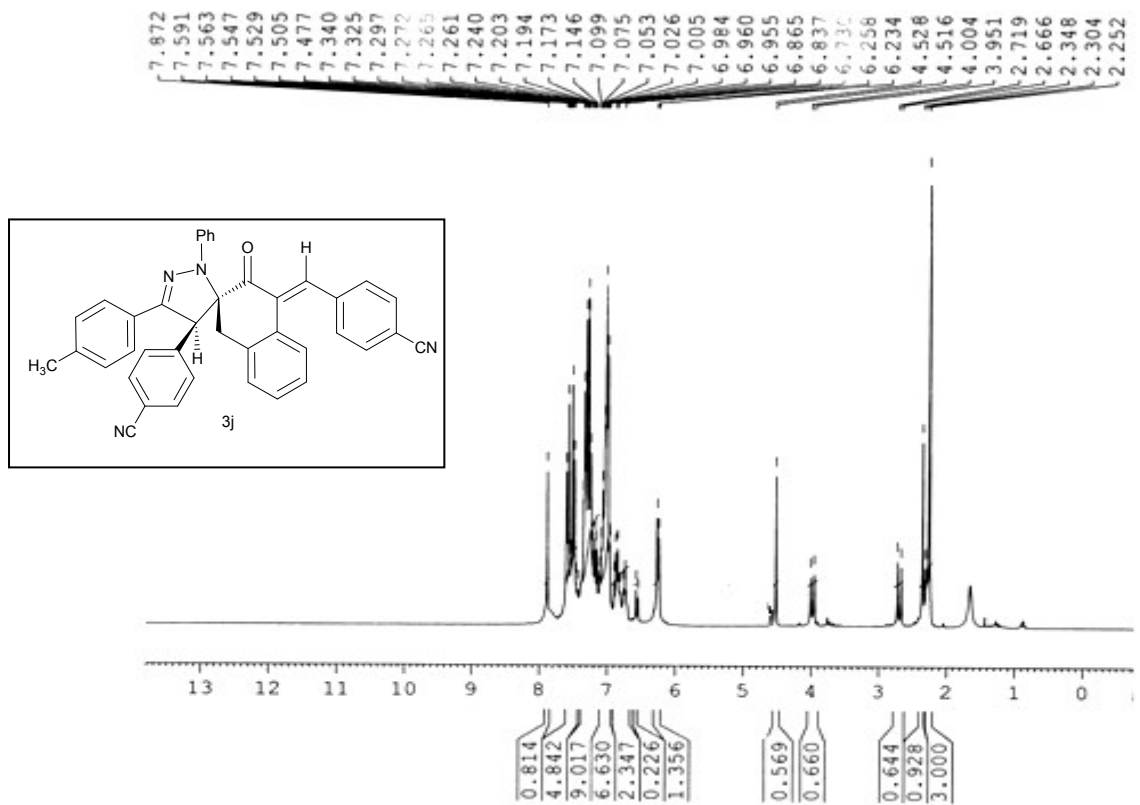

**Fig 19.** <sup>1</sup>H NMR Spectrum of **3j** in CDCl<sub>3</sub>

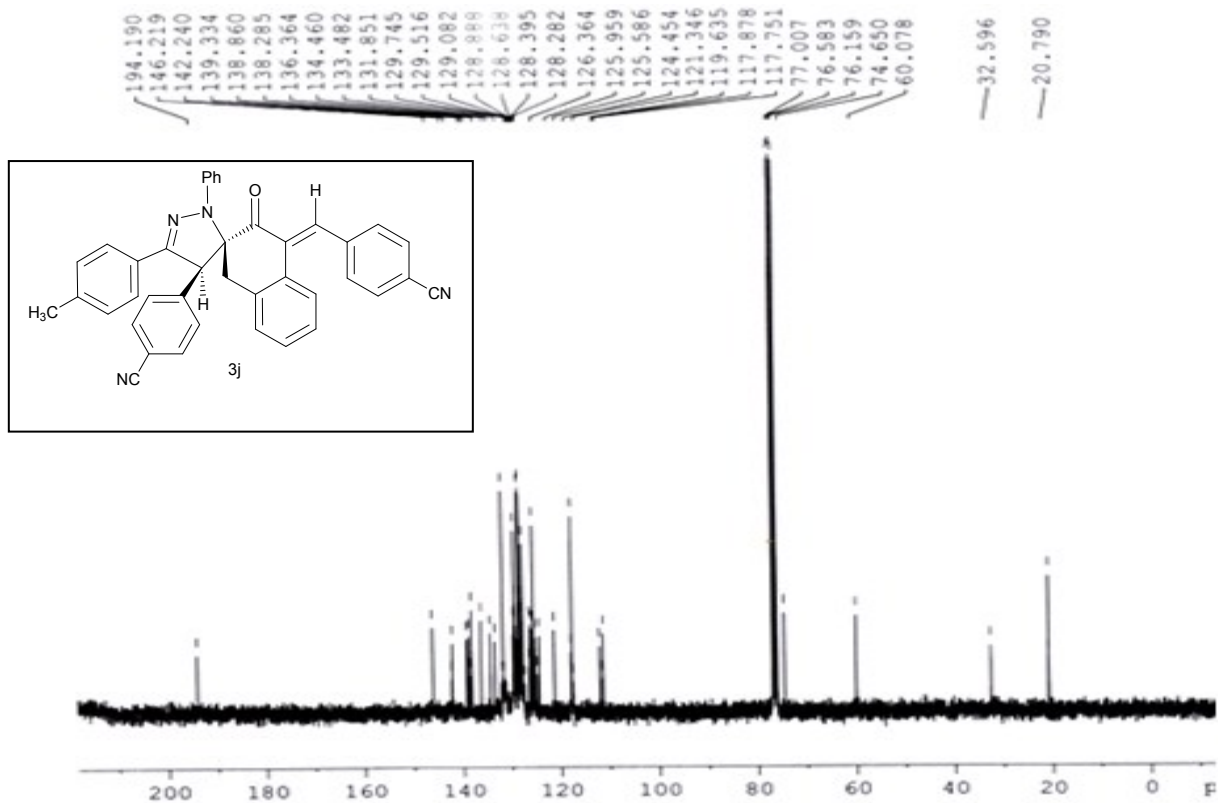

**Fig 20.** <sup>13</sup>C NMR Spectrum of **3j** in CDCl<sub>3</sub>

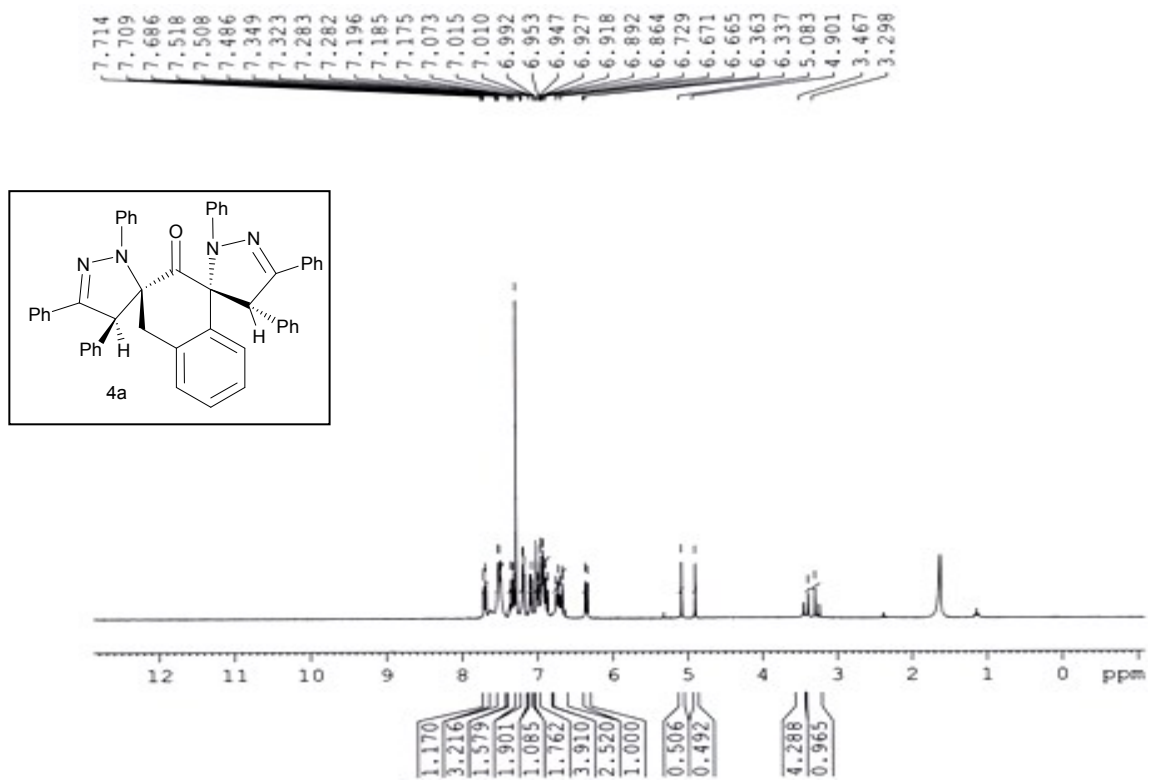

**Fig 21.** <sup>1</sup>H NMR Spectrum of 4a in CDCl<sub>3</sub>

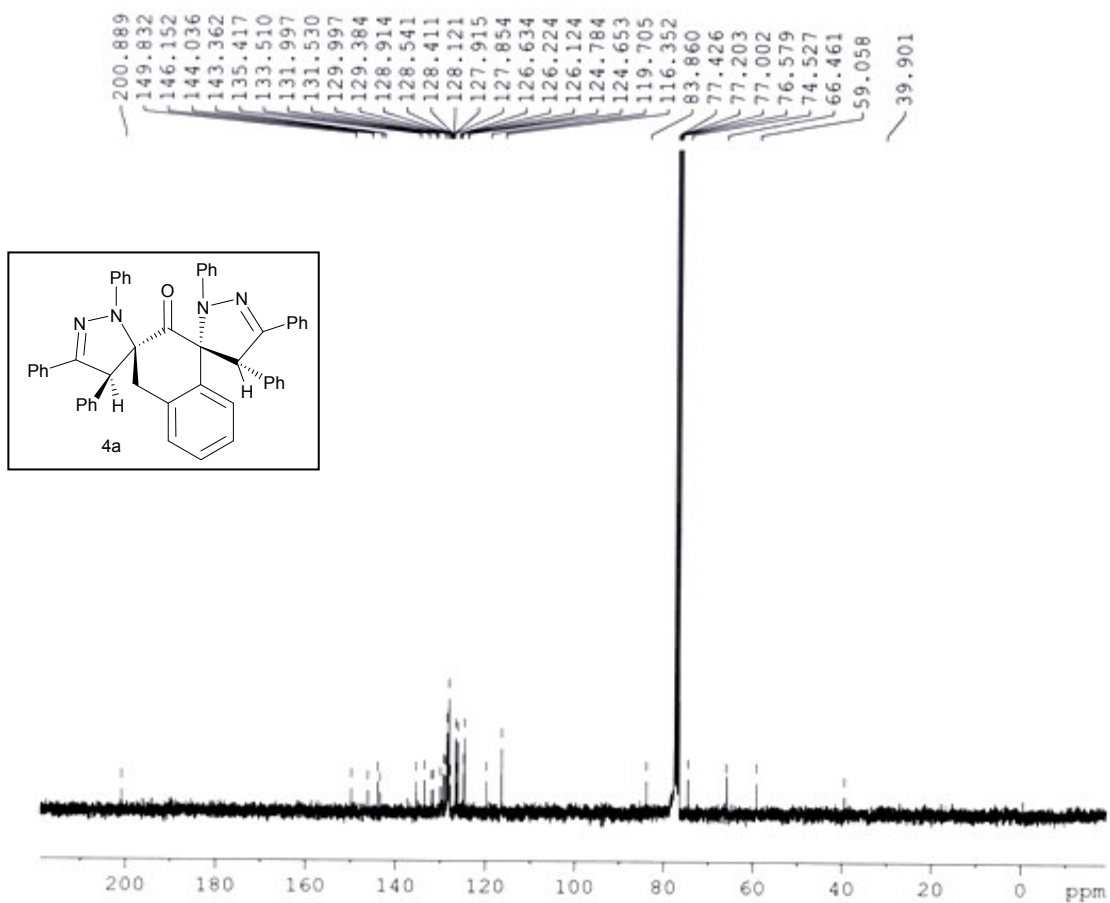

**Fig 22.** <sup>13</sup>C NMR Spectrum of 4a in CDCl<sub>3</sub>

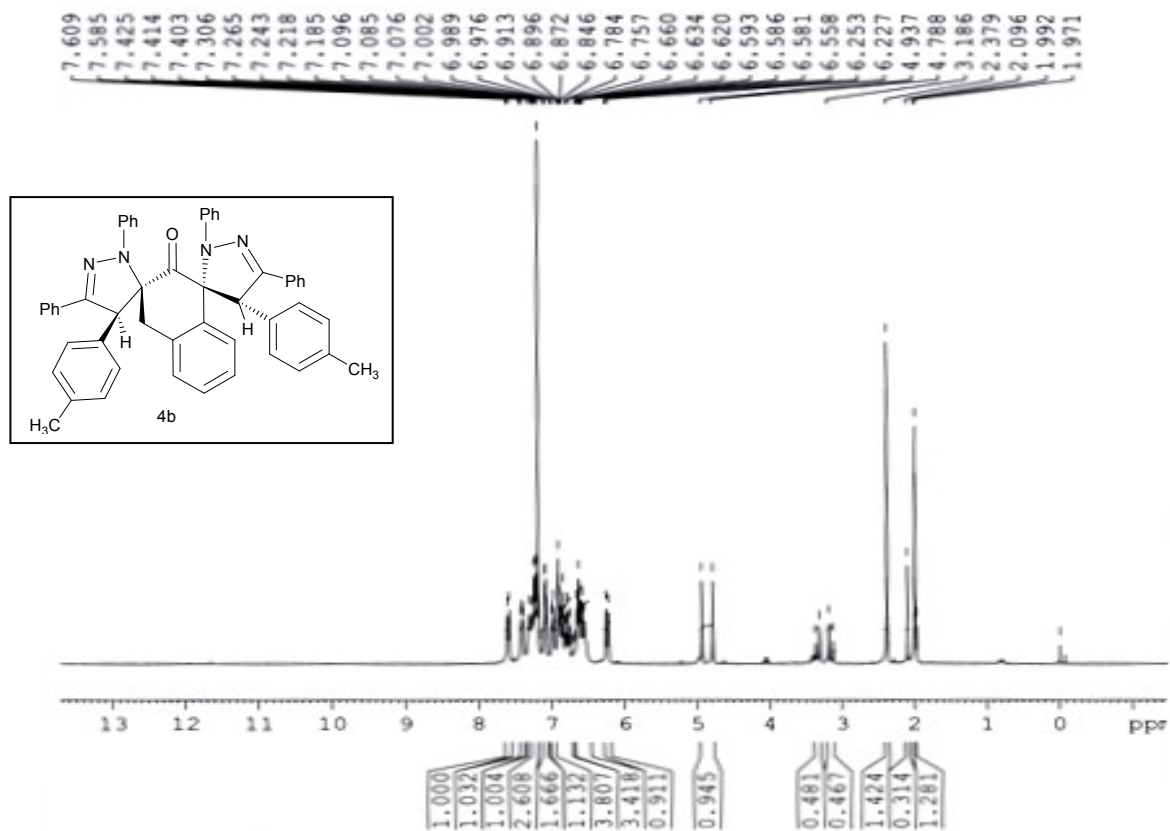

**Fig 23.** <sup>1</sup>H NMR Spectrum of **4b** in CDCl<sub>3</sub>

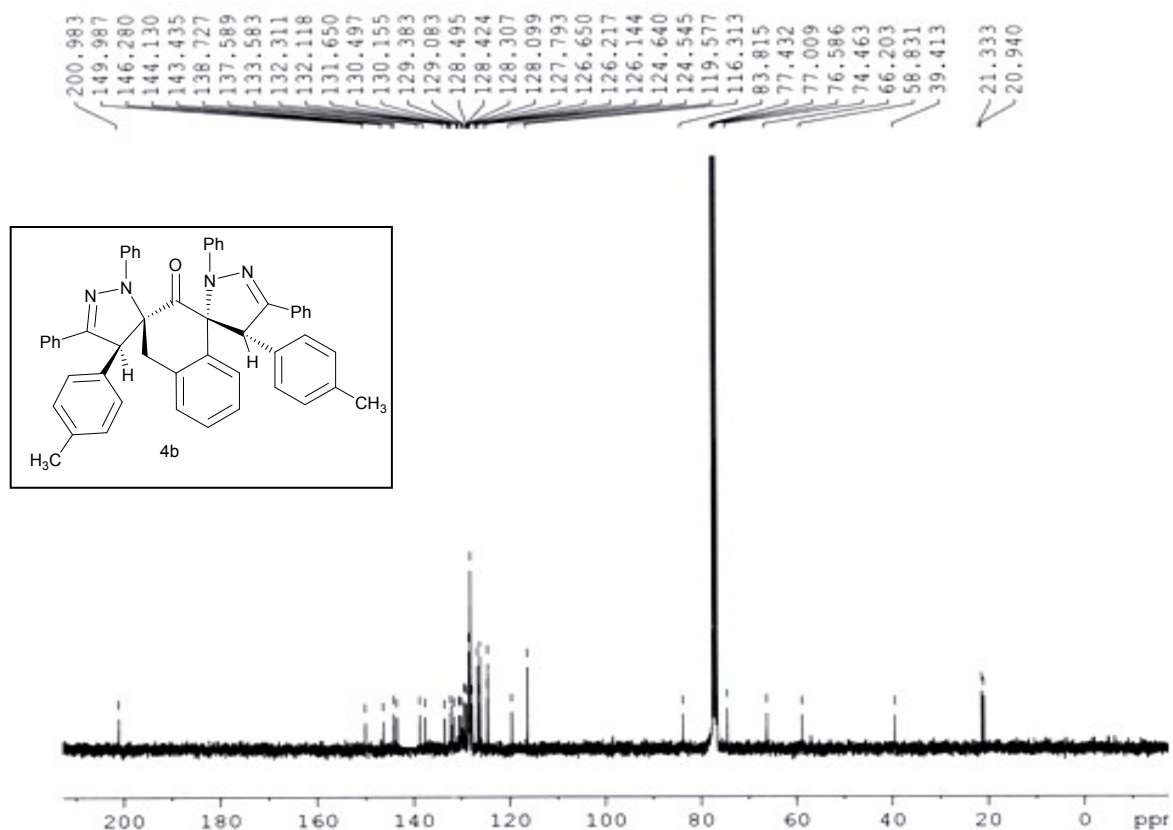

**Fig 24.** <sup>13</sup>C NMR Spectrum of **4b** in CDCl<sub>3</sub>

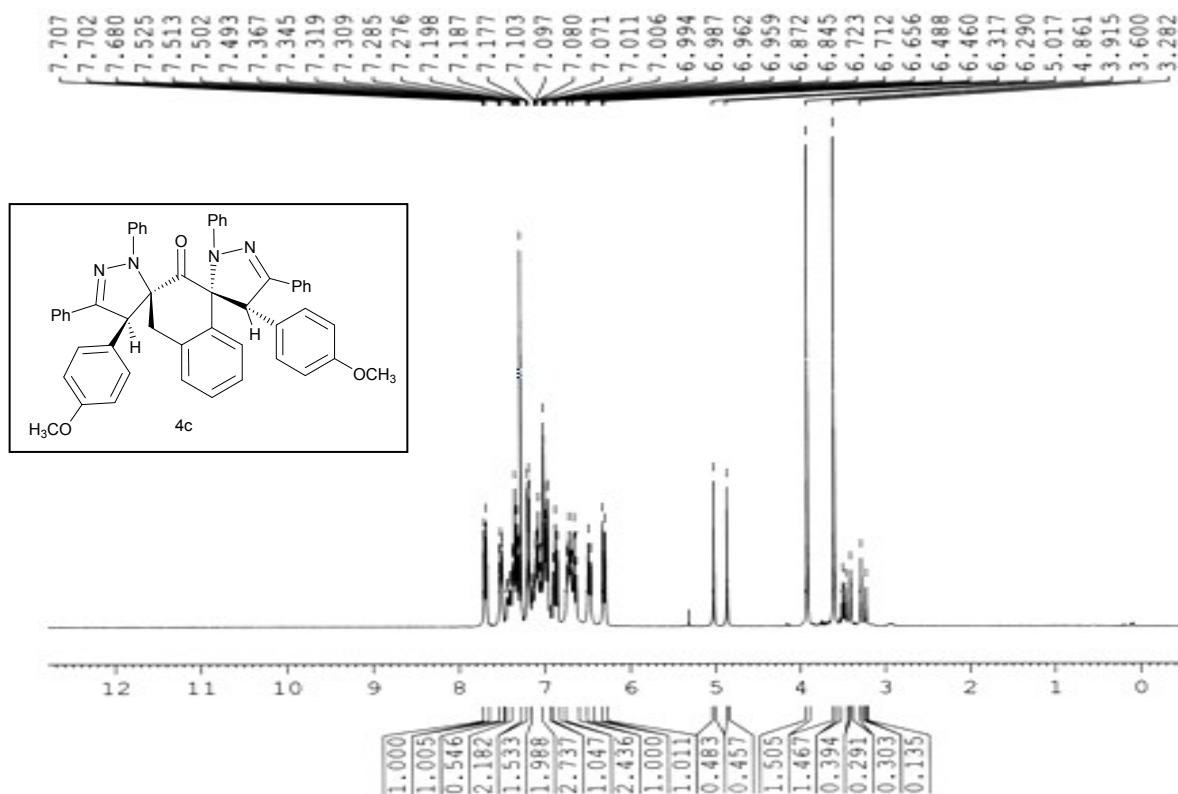

**Fig 25.**  $^1\text{H}$  NMR Spectrum of **4c** in  $\text{CDCl}_3$

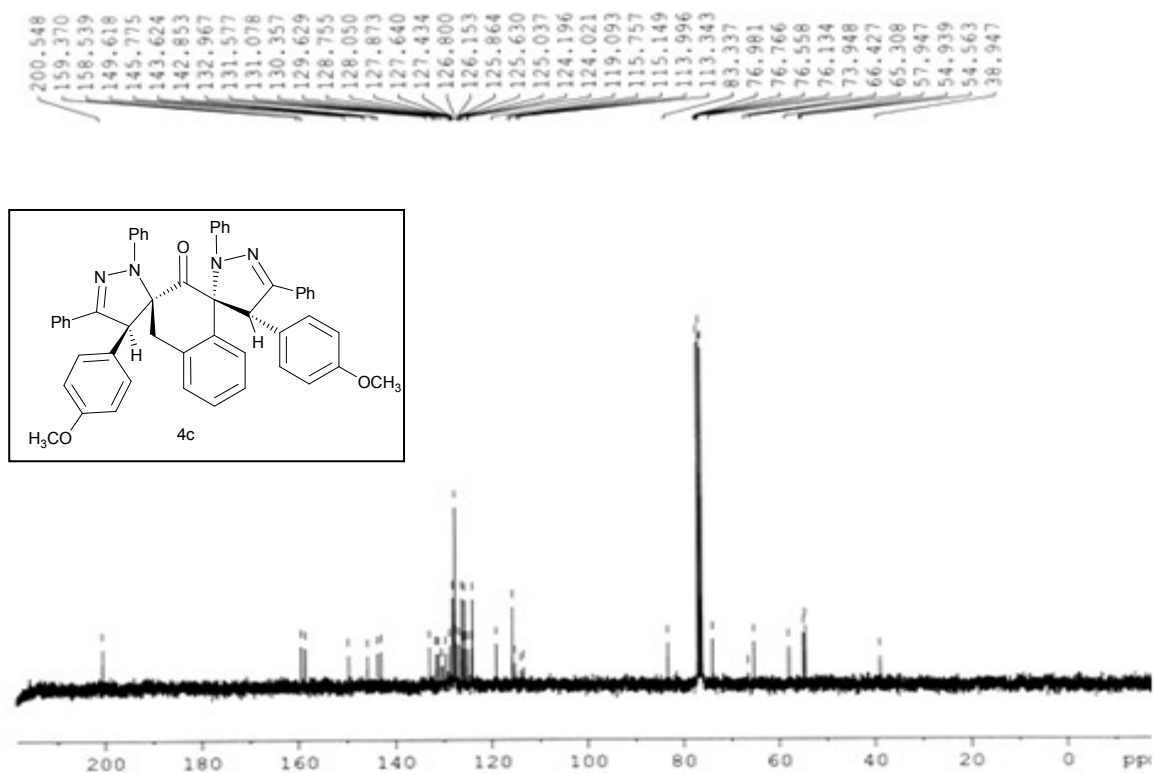

**Fig 26.**  $^{13}\text{C}$  NMR Spectrum of **4c** in  $\text{CDCl}_3$

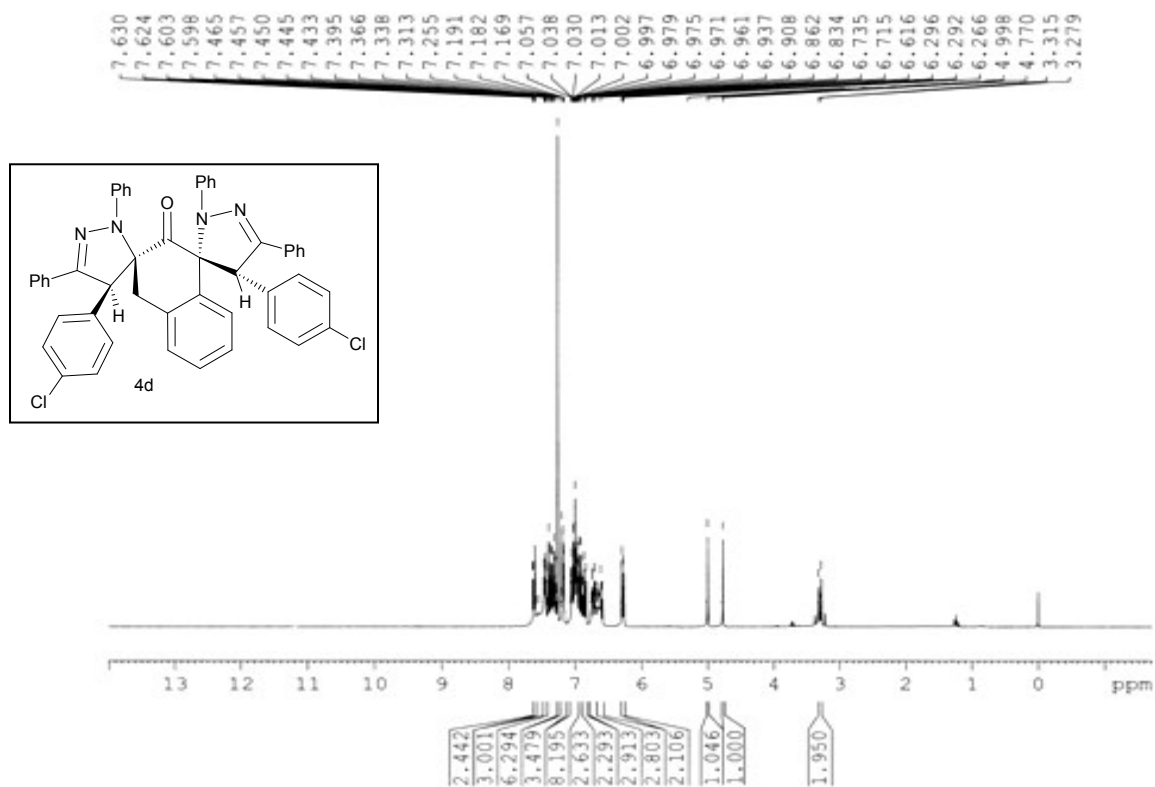

**Fig 27.** <sup>1</sup>H NMR Spectrum of **4d** in CDCl<sub>3</sub>

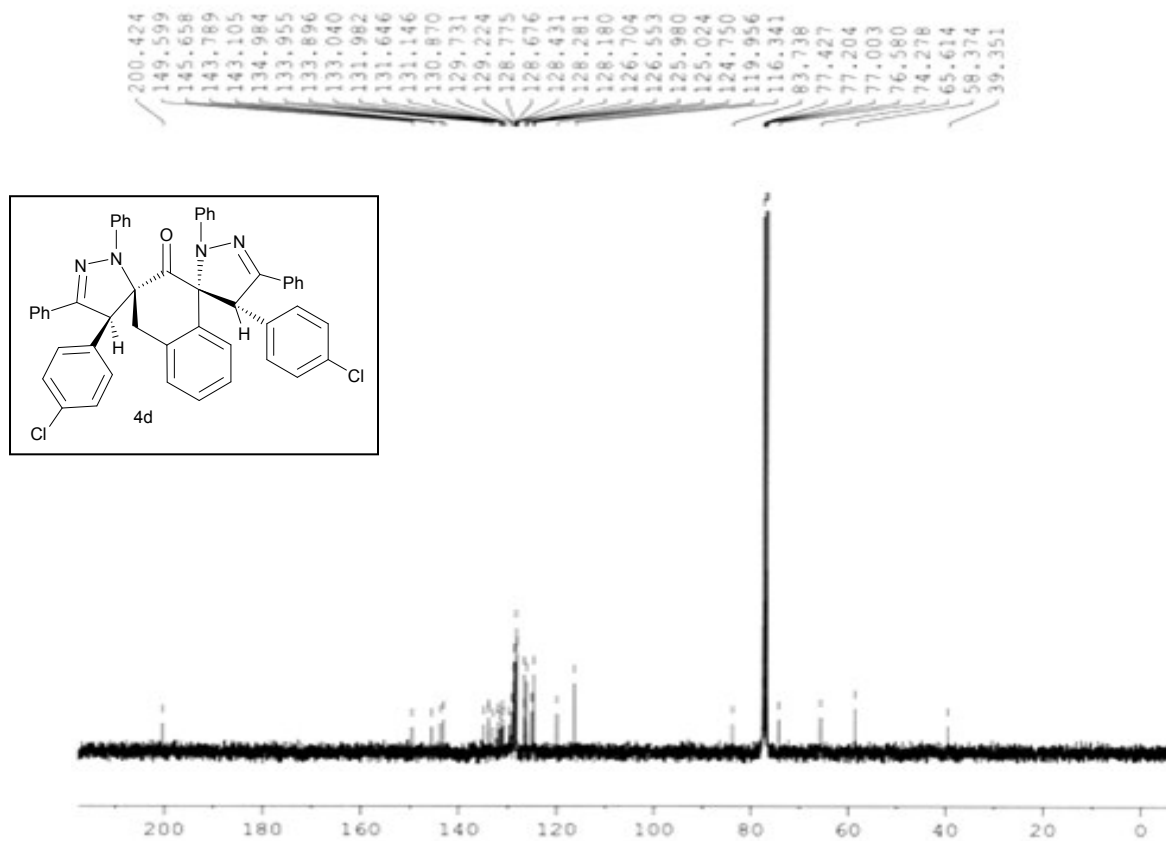

**Fig 28.** <sup>13</sup>C NMR Spectrum of **4d** in CDCl<sub>3</sub>

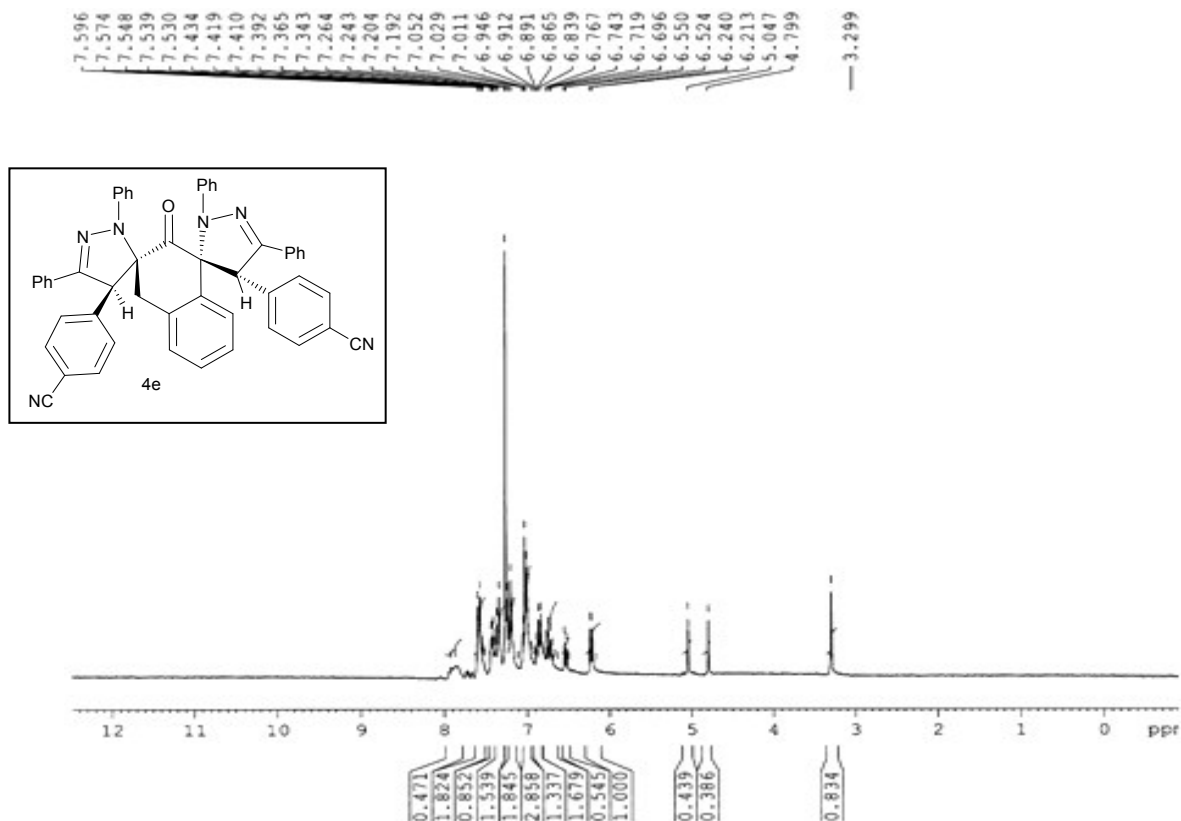

**Fig 29.** <sup>1</sup>H NMR Spectrum of **4e** in CDCl<sub>3</sub>

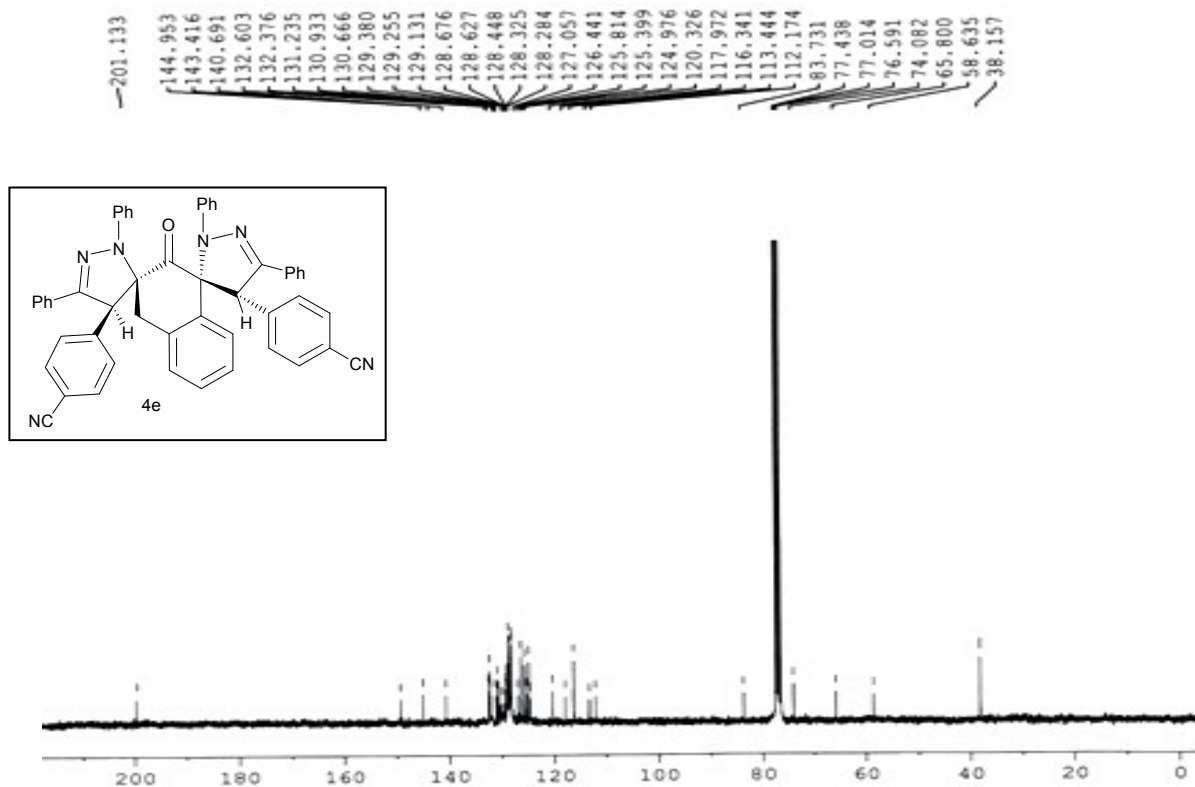

**Fig 30.** <sup>13</sup>C NMR Spectrum of **4e** in CDCl<sub>3</sub>

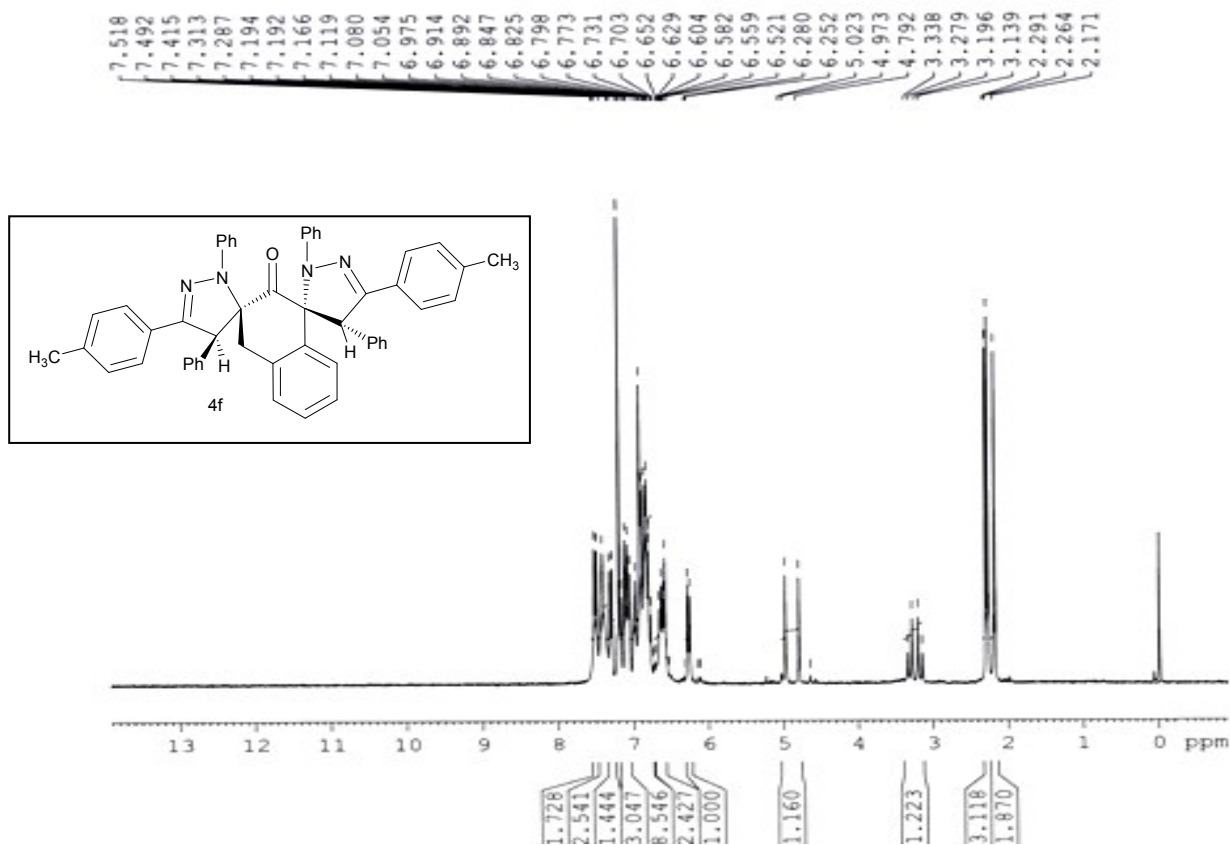

**Fig 31.**  $^1\text{H}$  NMR Spectrum of **4f** in  $\text{CDCl}_3$

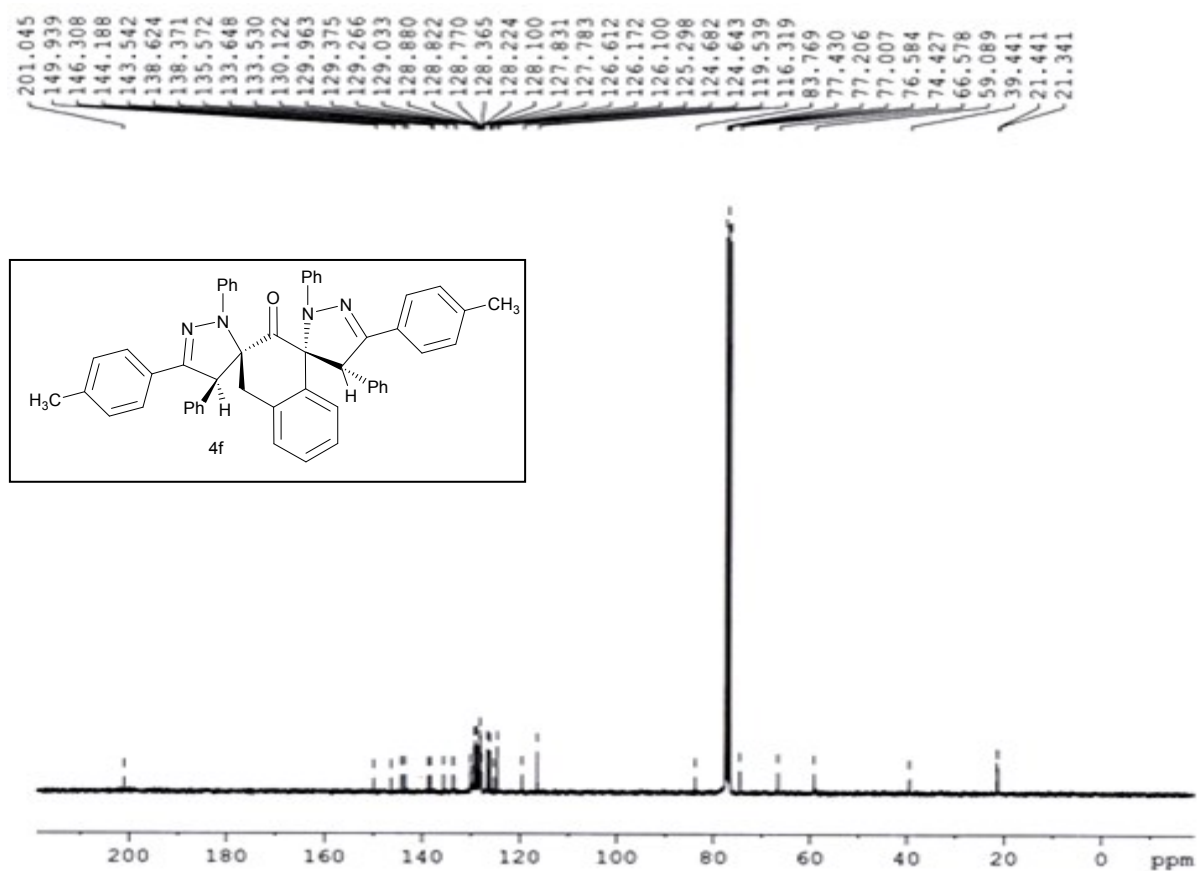

**Fig 32.**  $^{13}\text{C}$  NMR Spectrum of **4f** in  $\text{CDCl}_3$

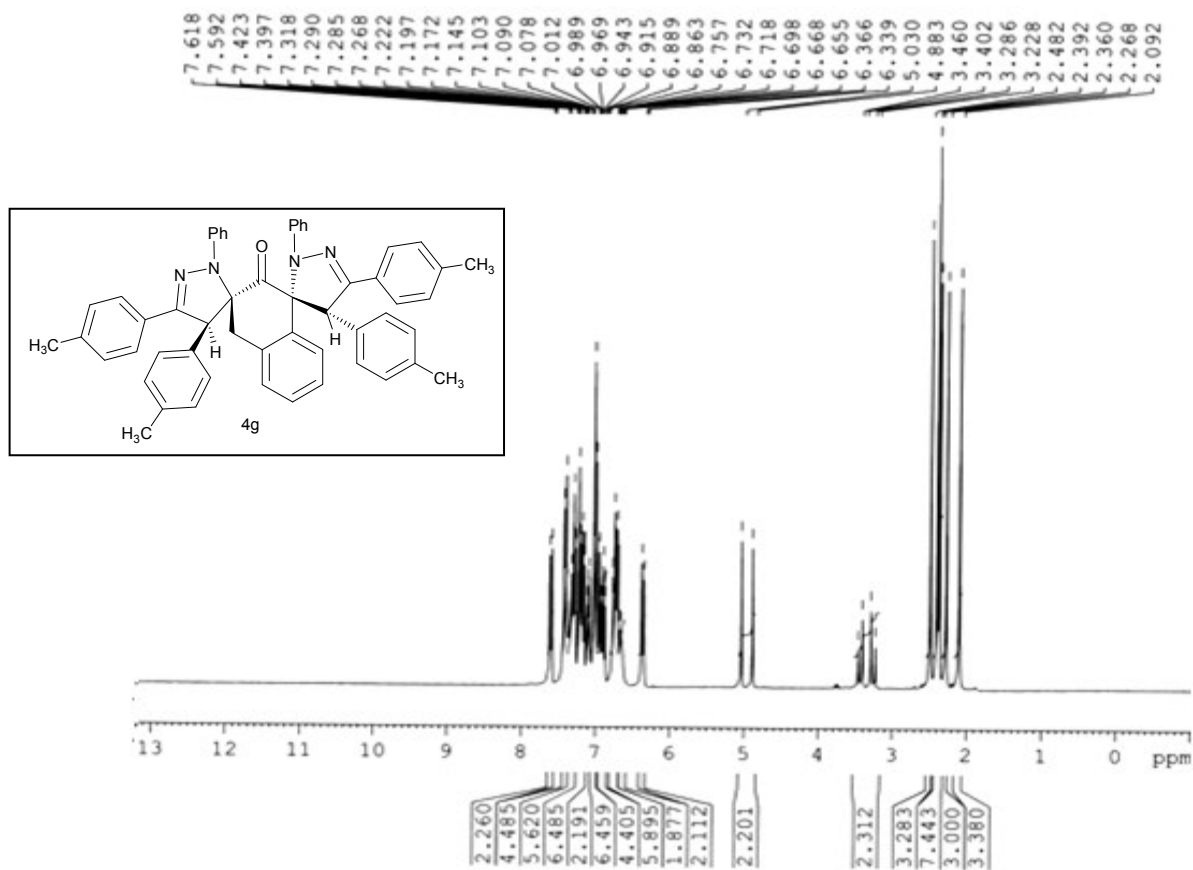

**Fig 33.** <sup>1</sup>H NMR Spectrum of **4g** in CDCl<sub>3</sub>

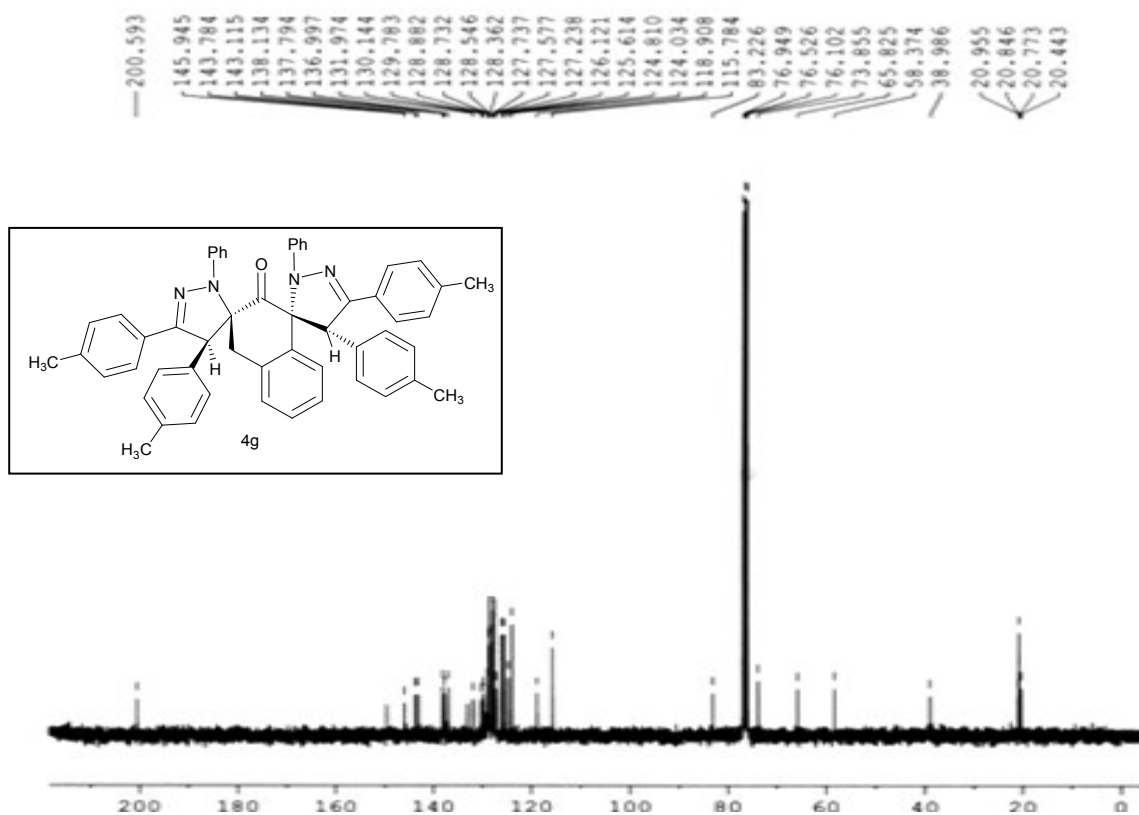

**Fig 34.** <sup>13</sup>C NMR Spectrum of **4g** in CDCl<sub>3</sub>



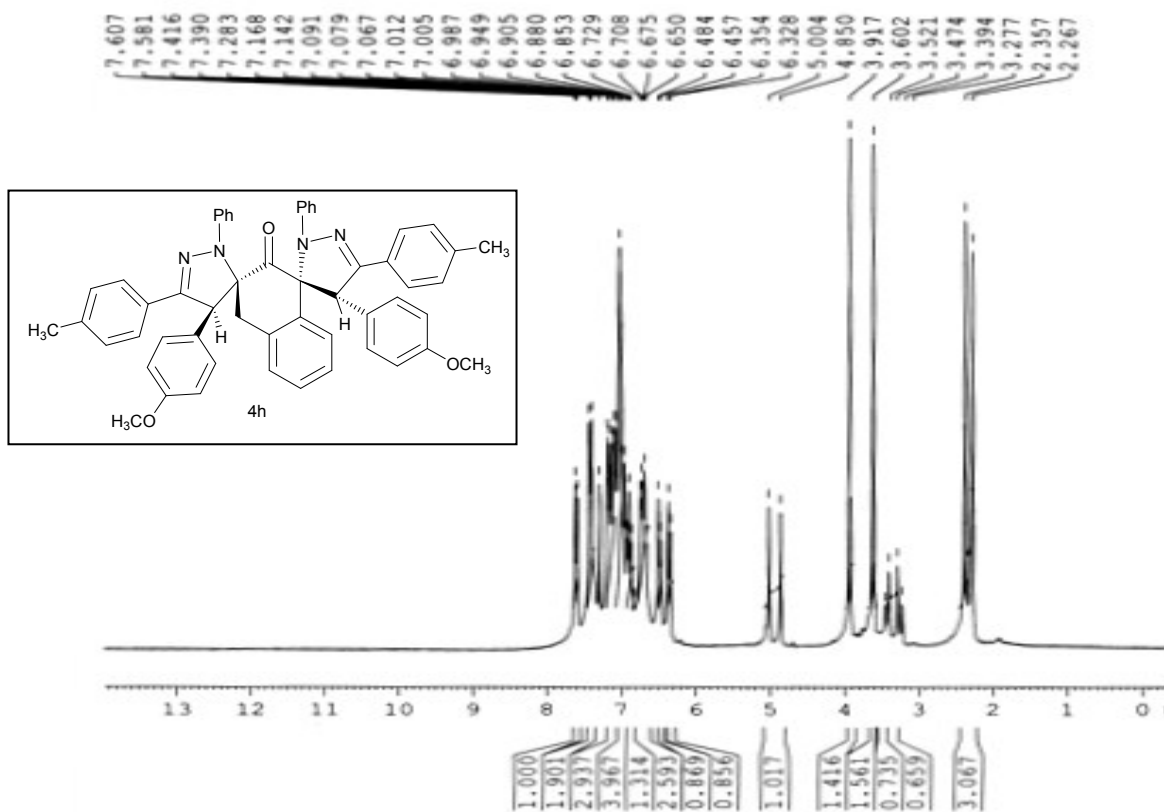

**Fig 35.** <sup>1</sup>H NMR Spectrum of **4h** in CDCl<sub>3</sub>

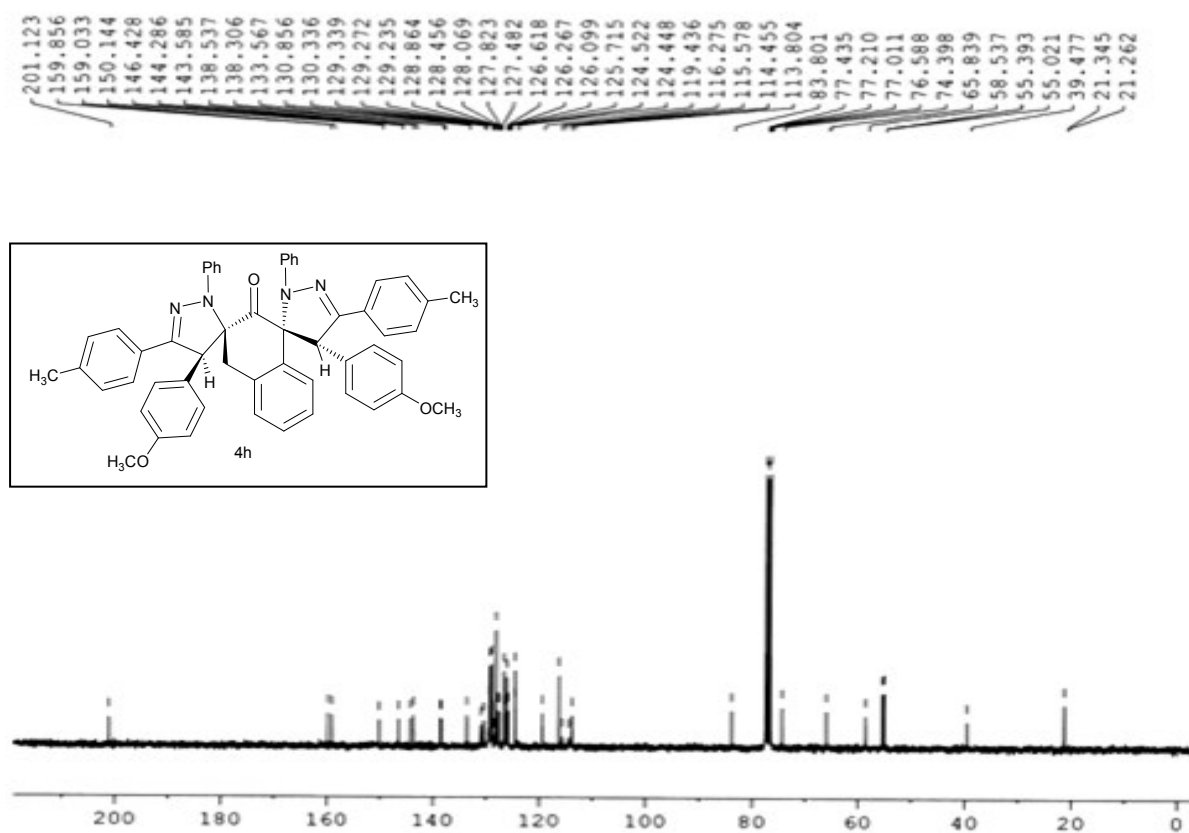

**Fig 36.** <sup>13</sup>C NMR Spectrum of **4h** in CDCl<sub>3</sub>

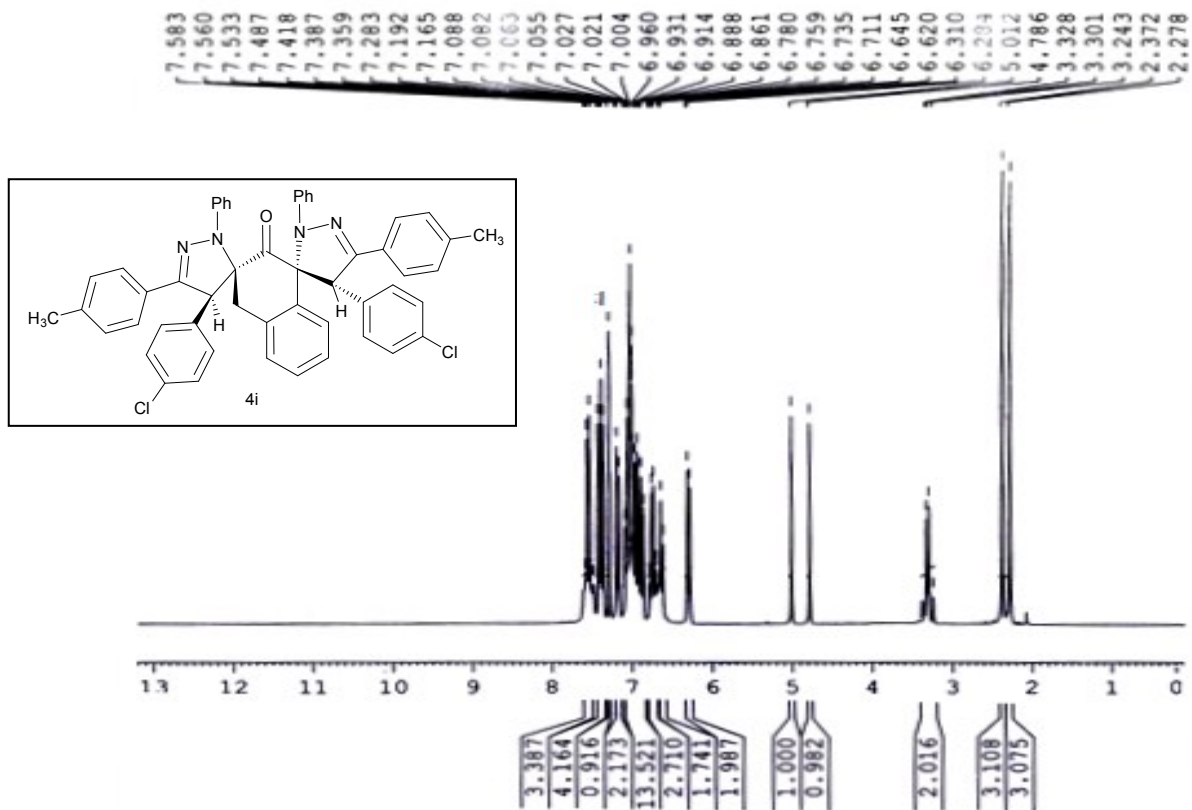

**Fig 37.**  $^1\text{H}$  NMR Spectrum of **4i** in  $\text{CDCl}_3$

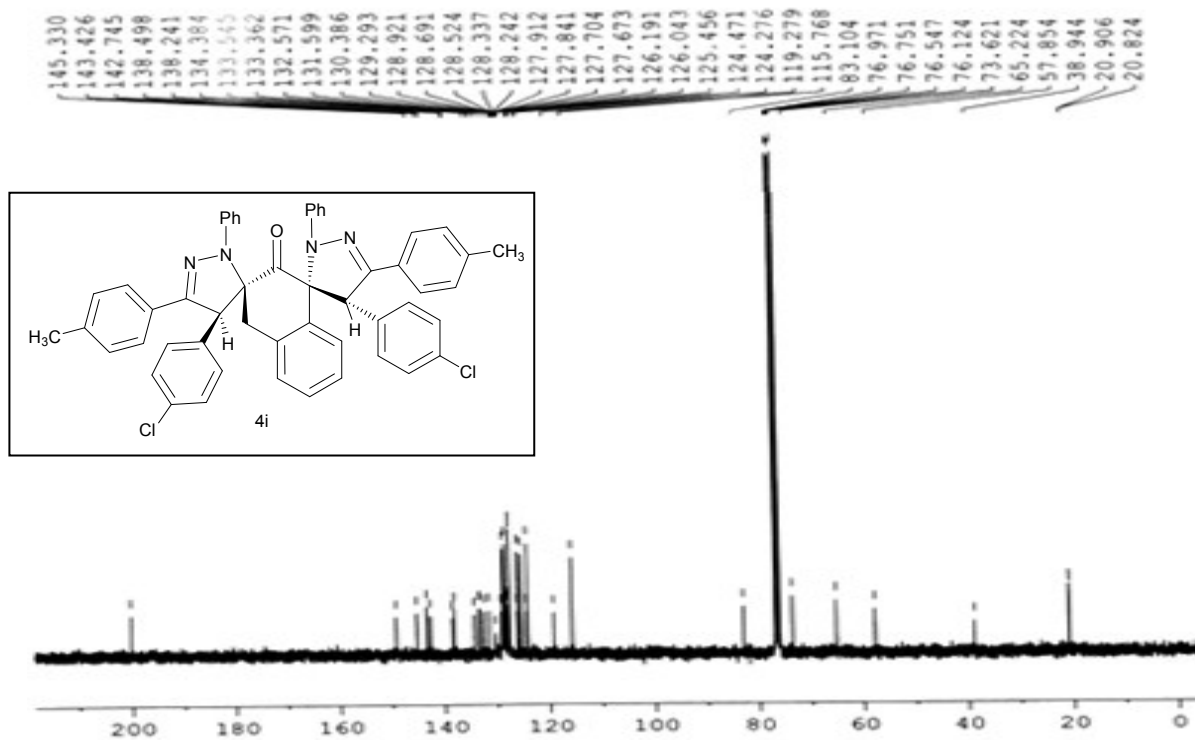

**Fig 38.**  $^{13}\text{C}$  NMR Spectrum of **4i** in  $\text{CDCl}_3$

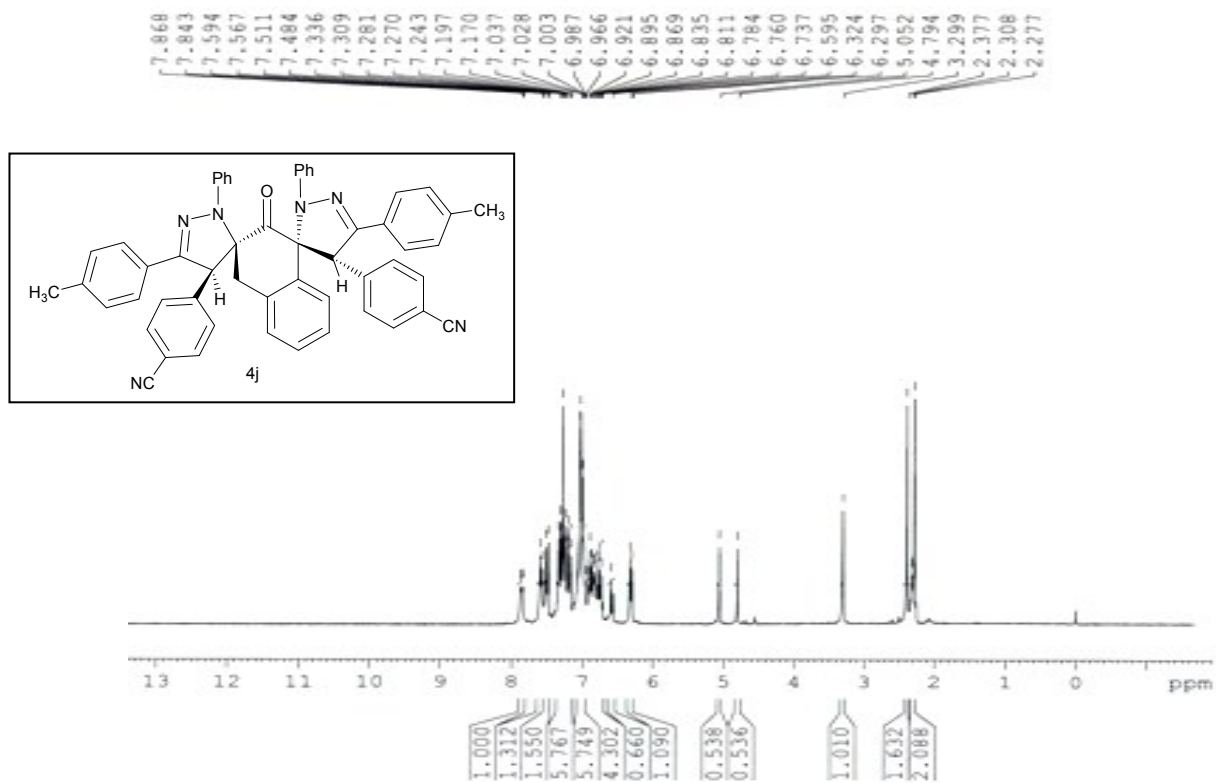

**Fig 39.**  $^1\text{H}$  NMR Spectrum of **4j** in CDCl<sub>3</sub>

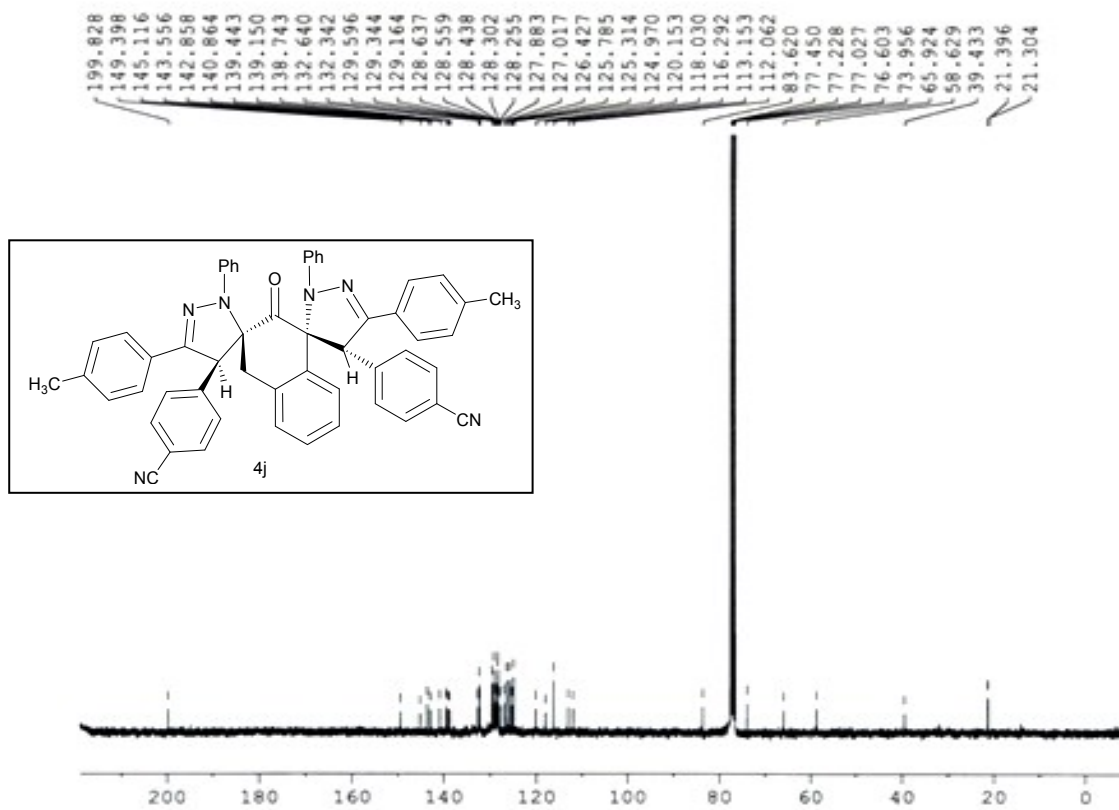

**Fig 40.**  $^{13}\text{C}$  NMR Spectrum of **4j** in CDCl<sub>3</sub>
